# Supplementary material for: Pleistocene Speciation in North American Lichenized Fungi and the Impact of Alternative Species Circumscriptions and Rates of Molecular Evolution on Divergence Estimates
Source: PLOS journal article supplement (doi:10.1371/journal.pone.0085240), 2013-12-26

**BAPS  $K = \text{estimated}$**

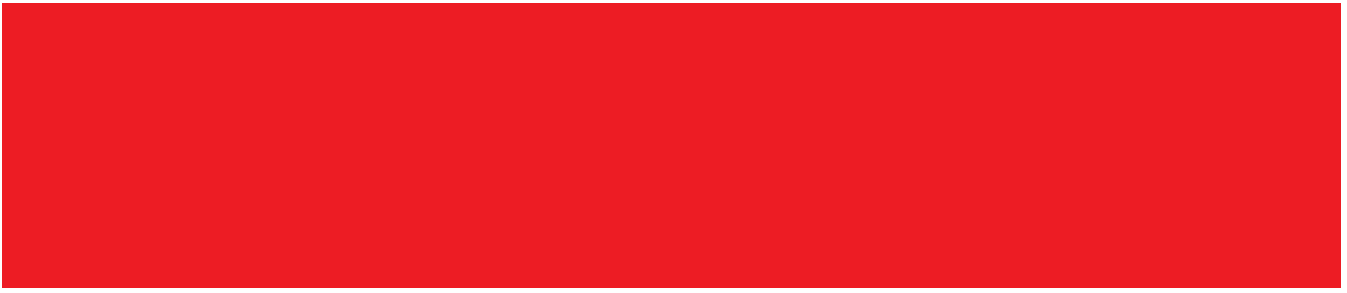

**STRUCTURE:  $K = 2$**

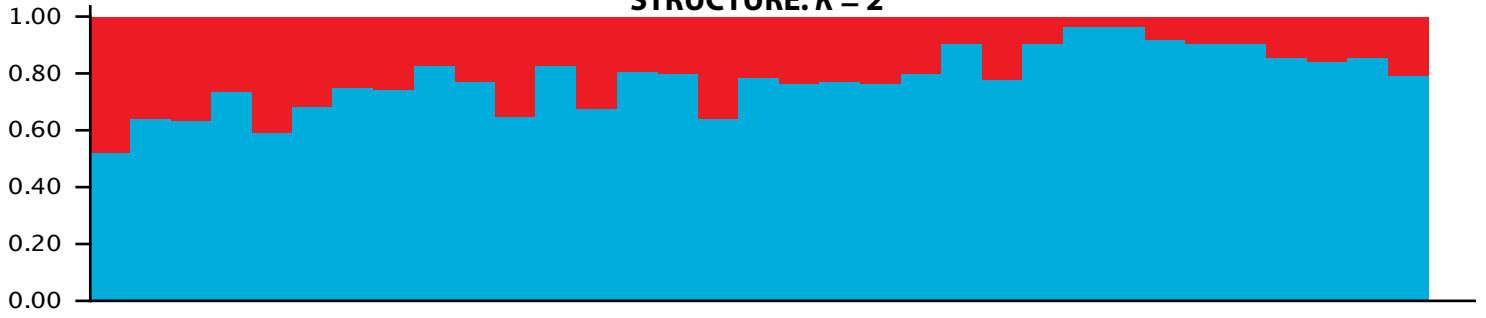

**STRUCTURE:  $K = 4$**

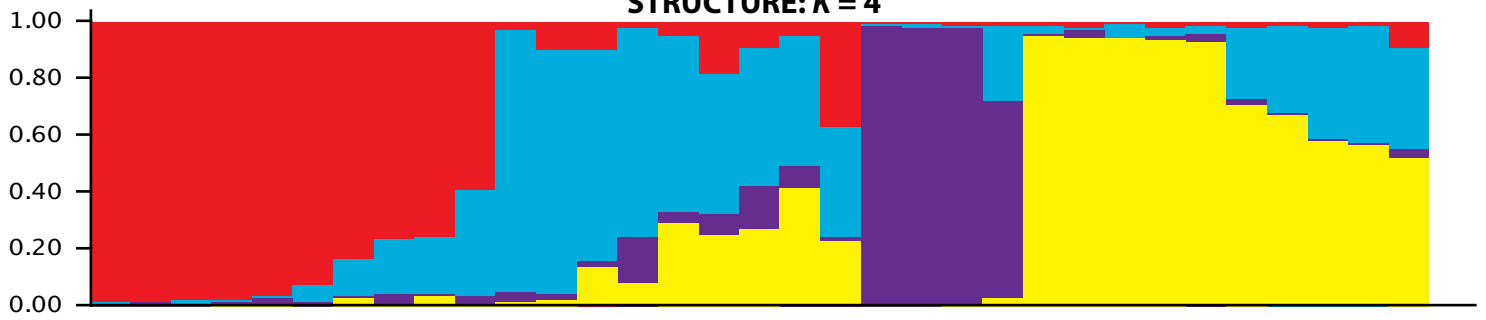

Supplement: S1 (10.1371/journal.pone.0085240.s001) [file journal.pone.0085240.s001.pdf › journal.pone.0085240.s001.pdf]
