# Supplementary material for: Pleistocene Speciation in North American Lichenized Fungi and the Impact of Alternative Species Circumscriptions and Rates of Molecular Evolution on Divergence Estimates
Source: PLOS journal article supplement (doi:10.1371/journal.pone.0085240), 2013-12-26
Supplement: S3 (10.1371/journal.pone.0085240.s003) [file journal.pone.0085240.s003.pdf › journal.pone.0085240.s003.pdf]

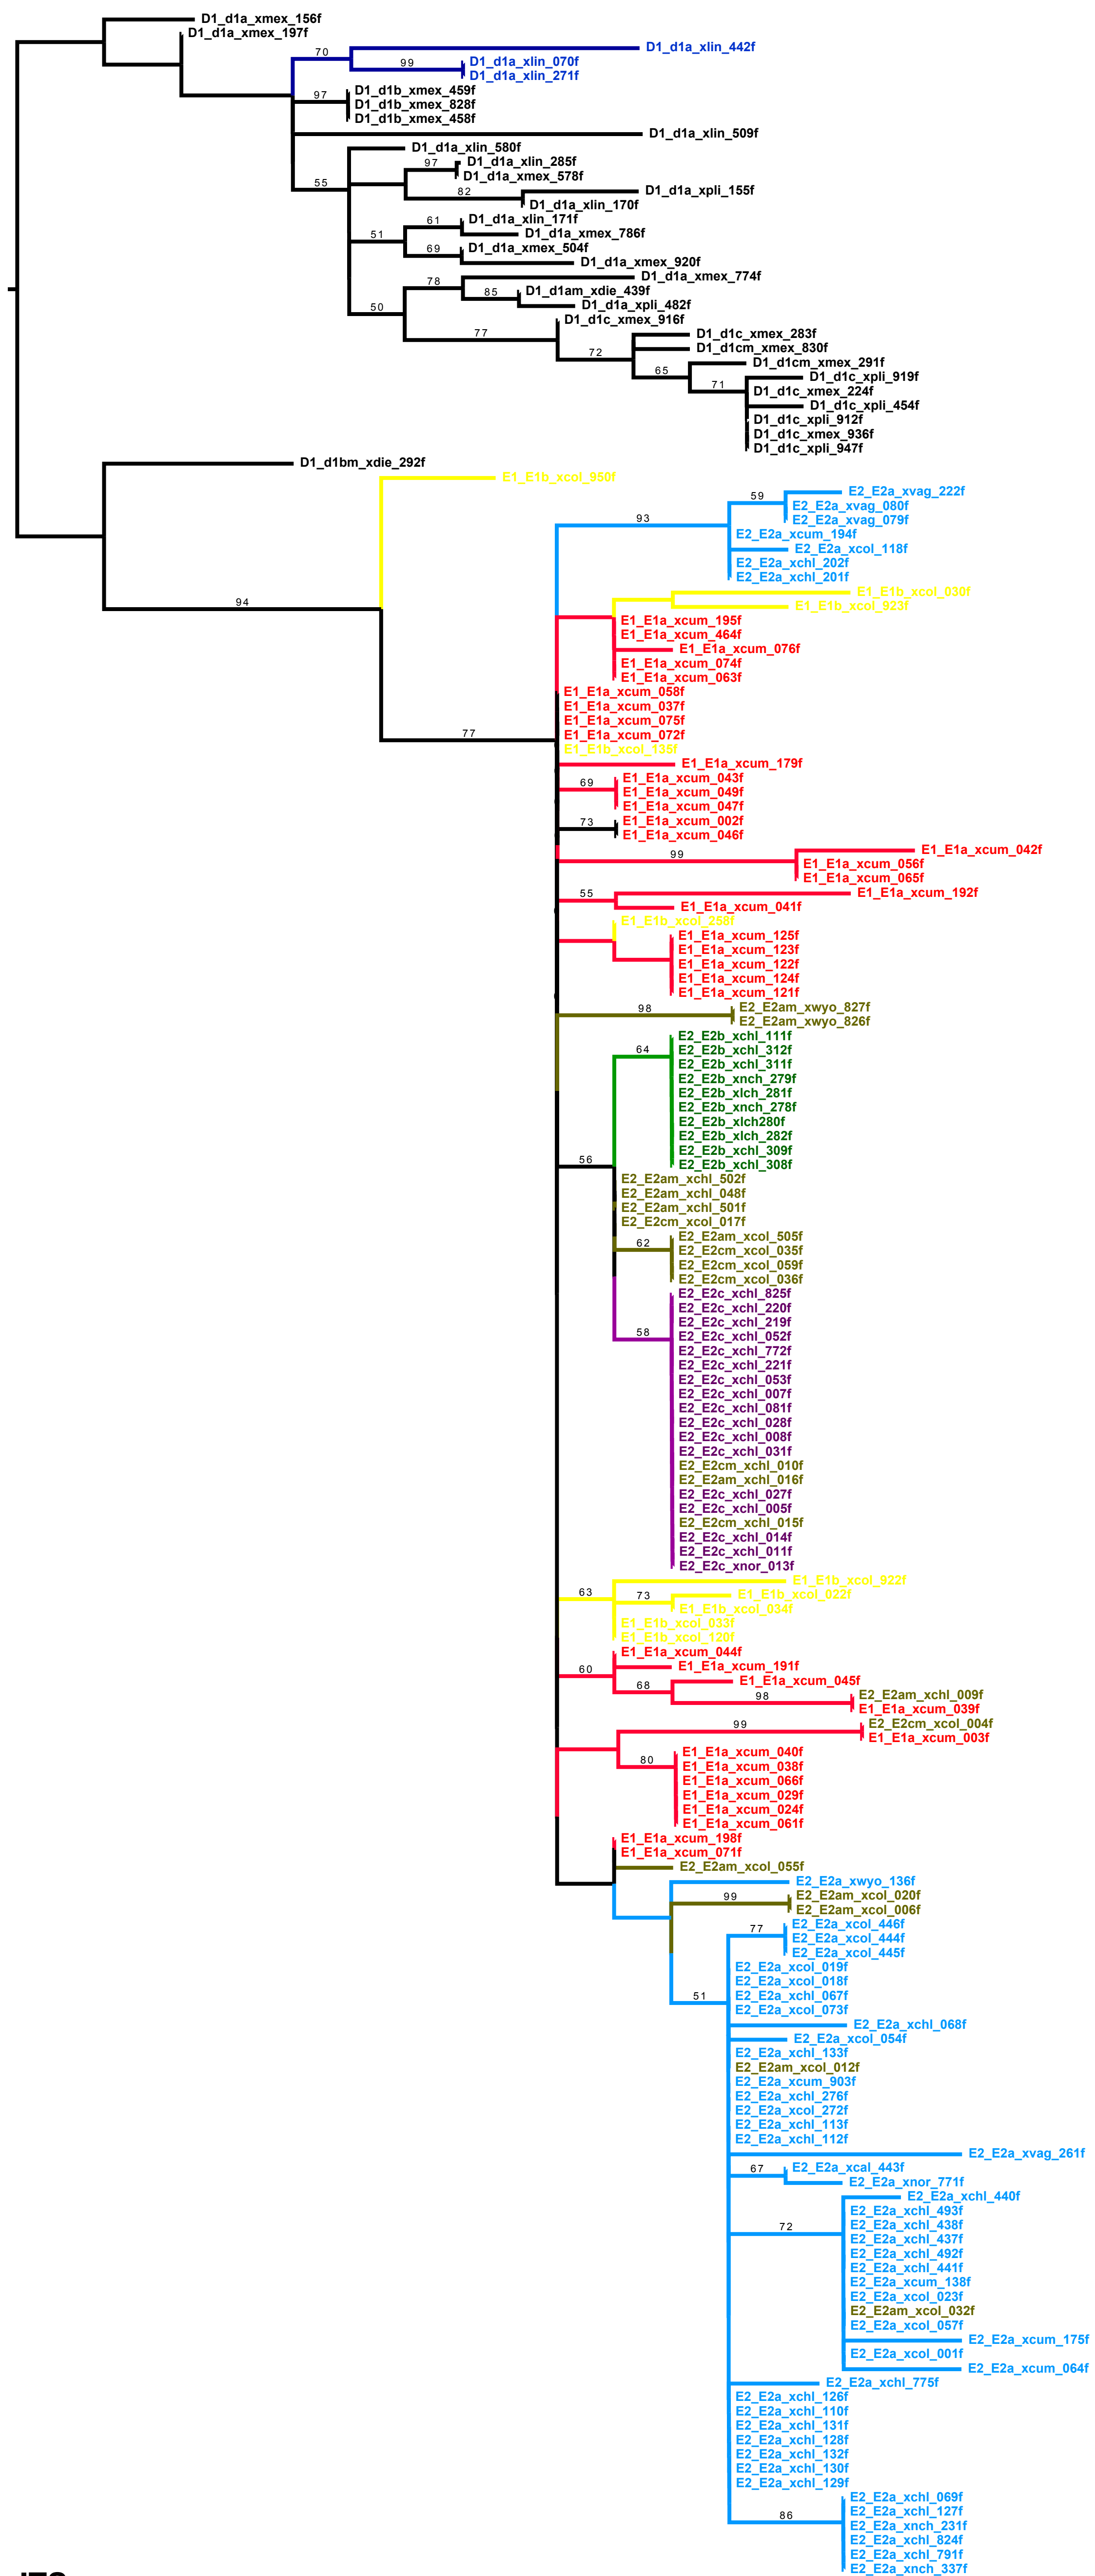

---

0.0050 substitutions/site

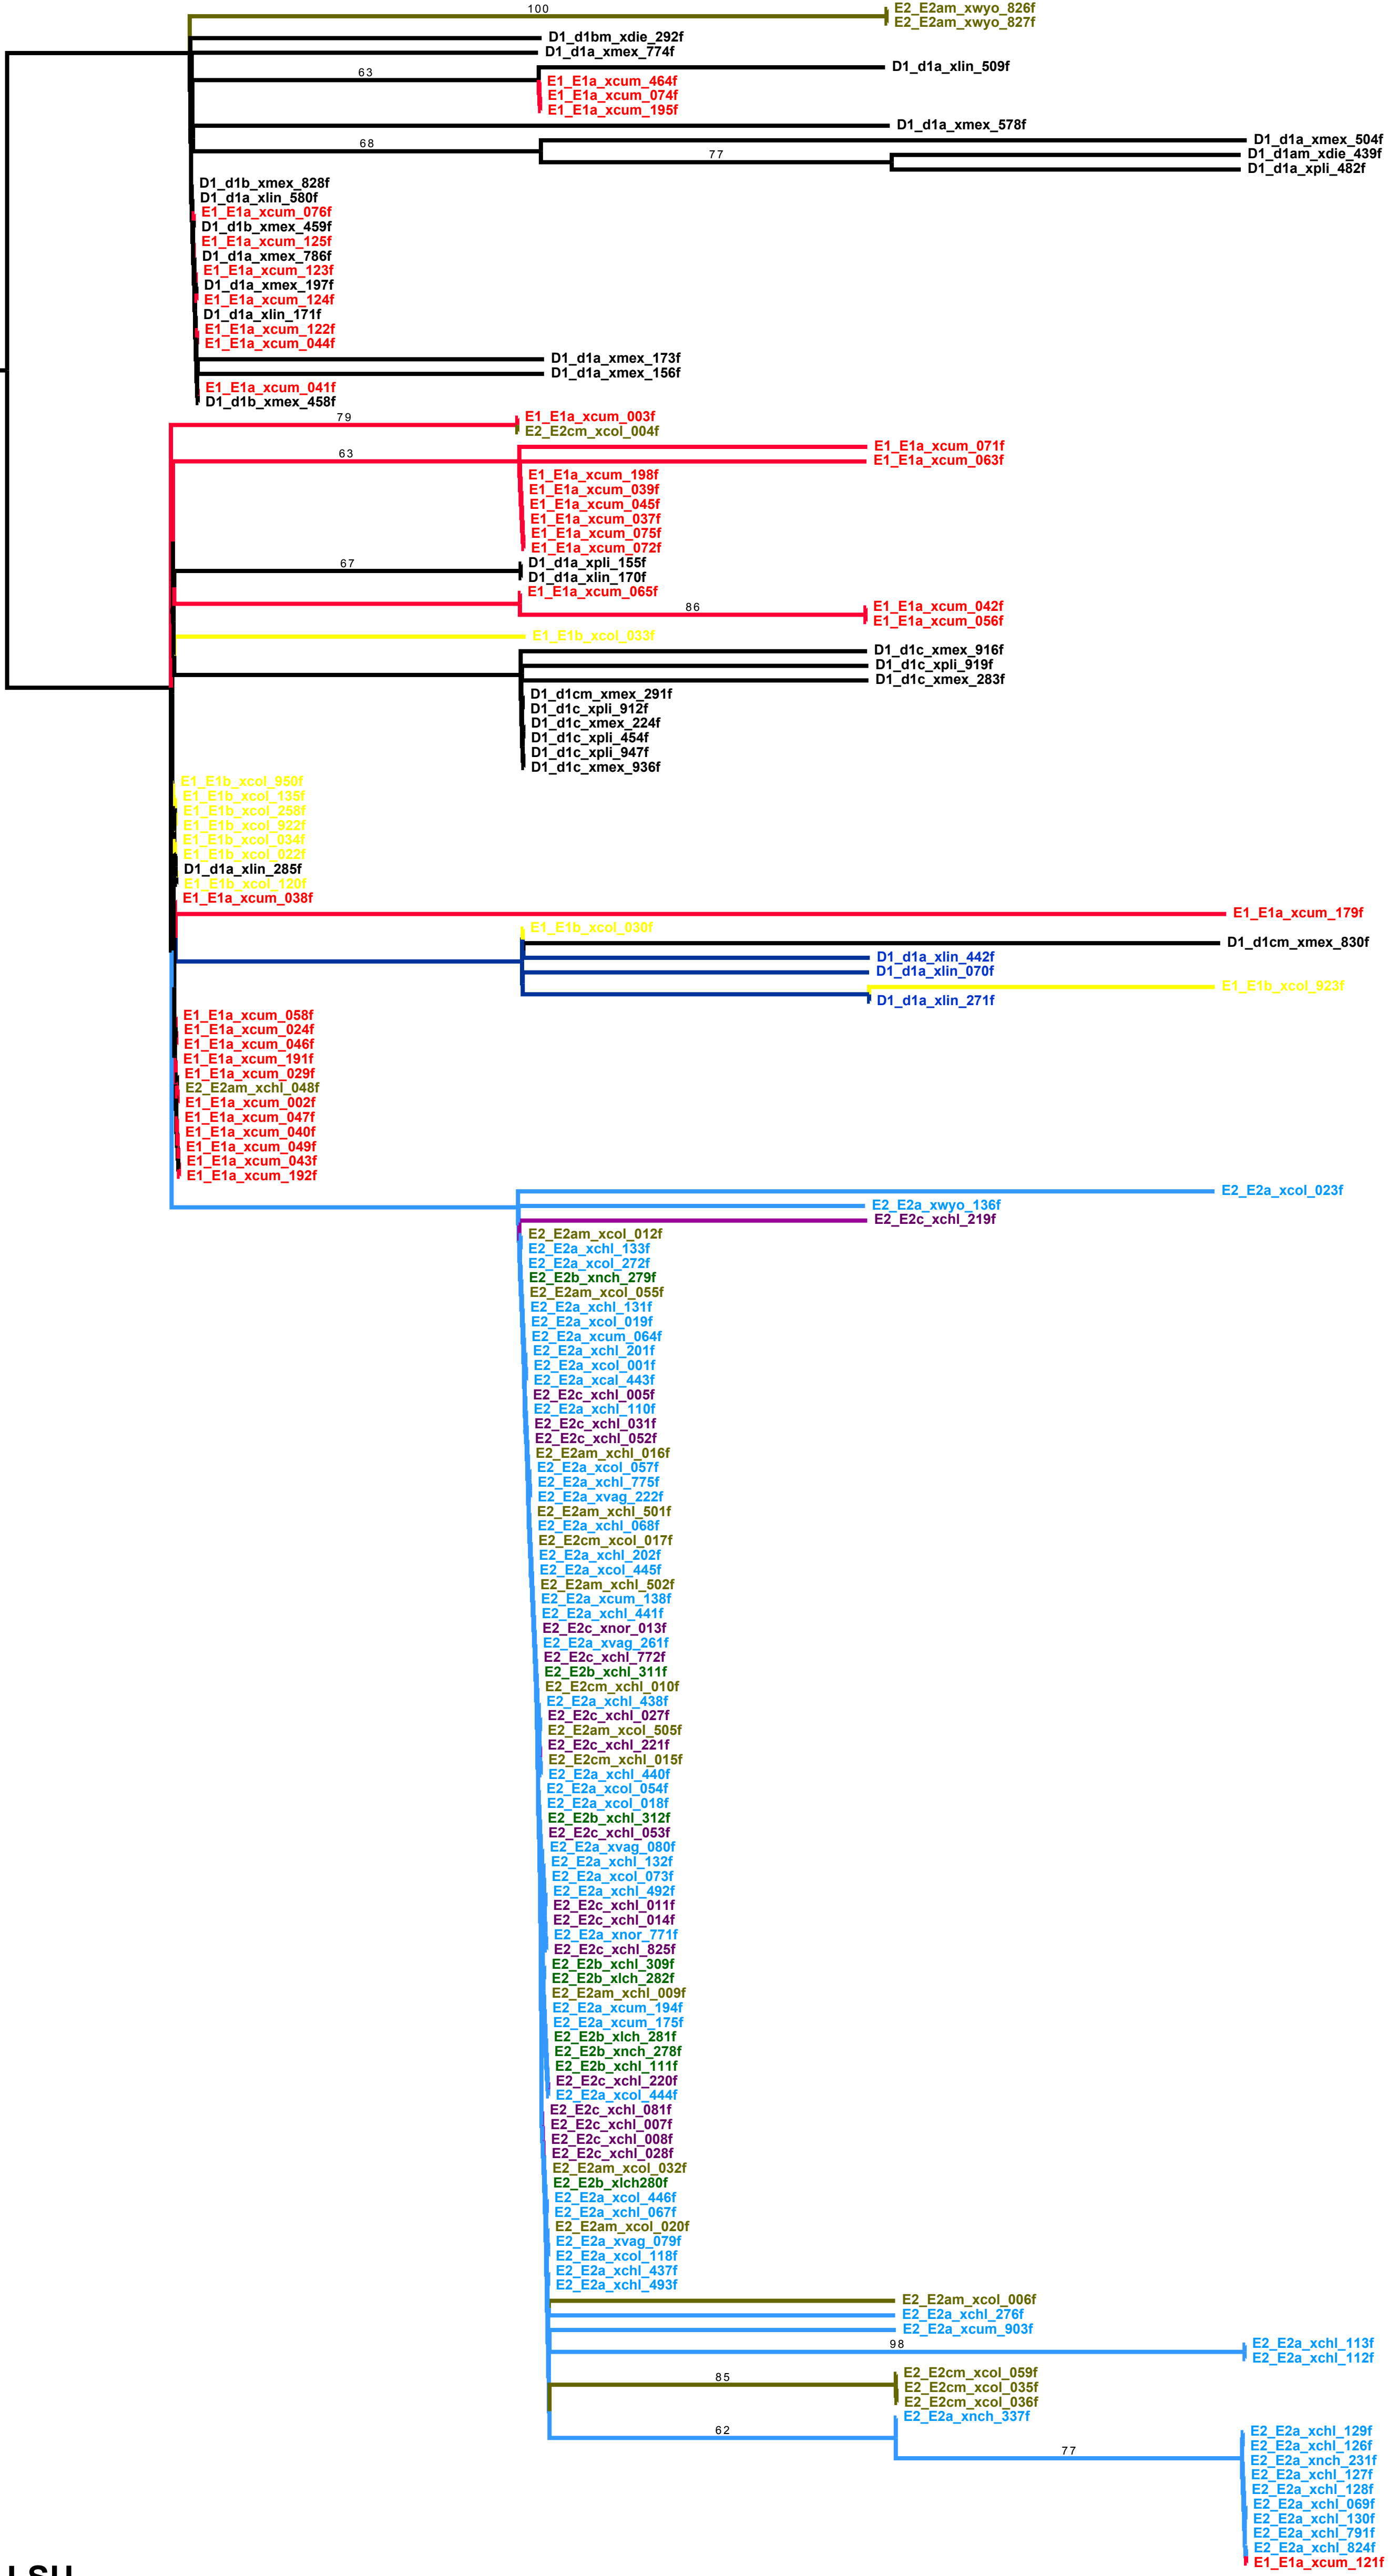

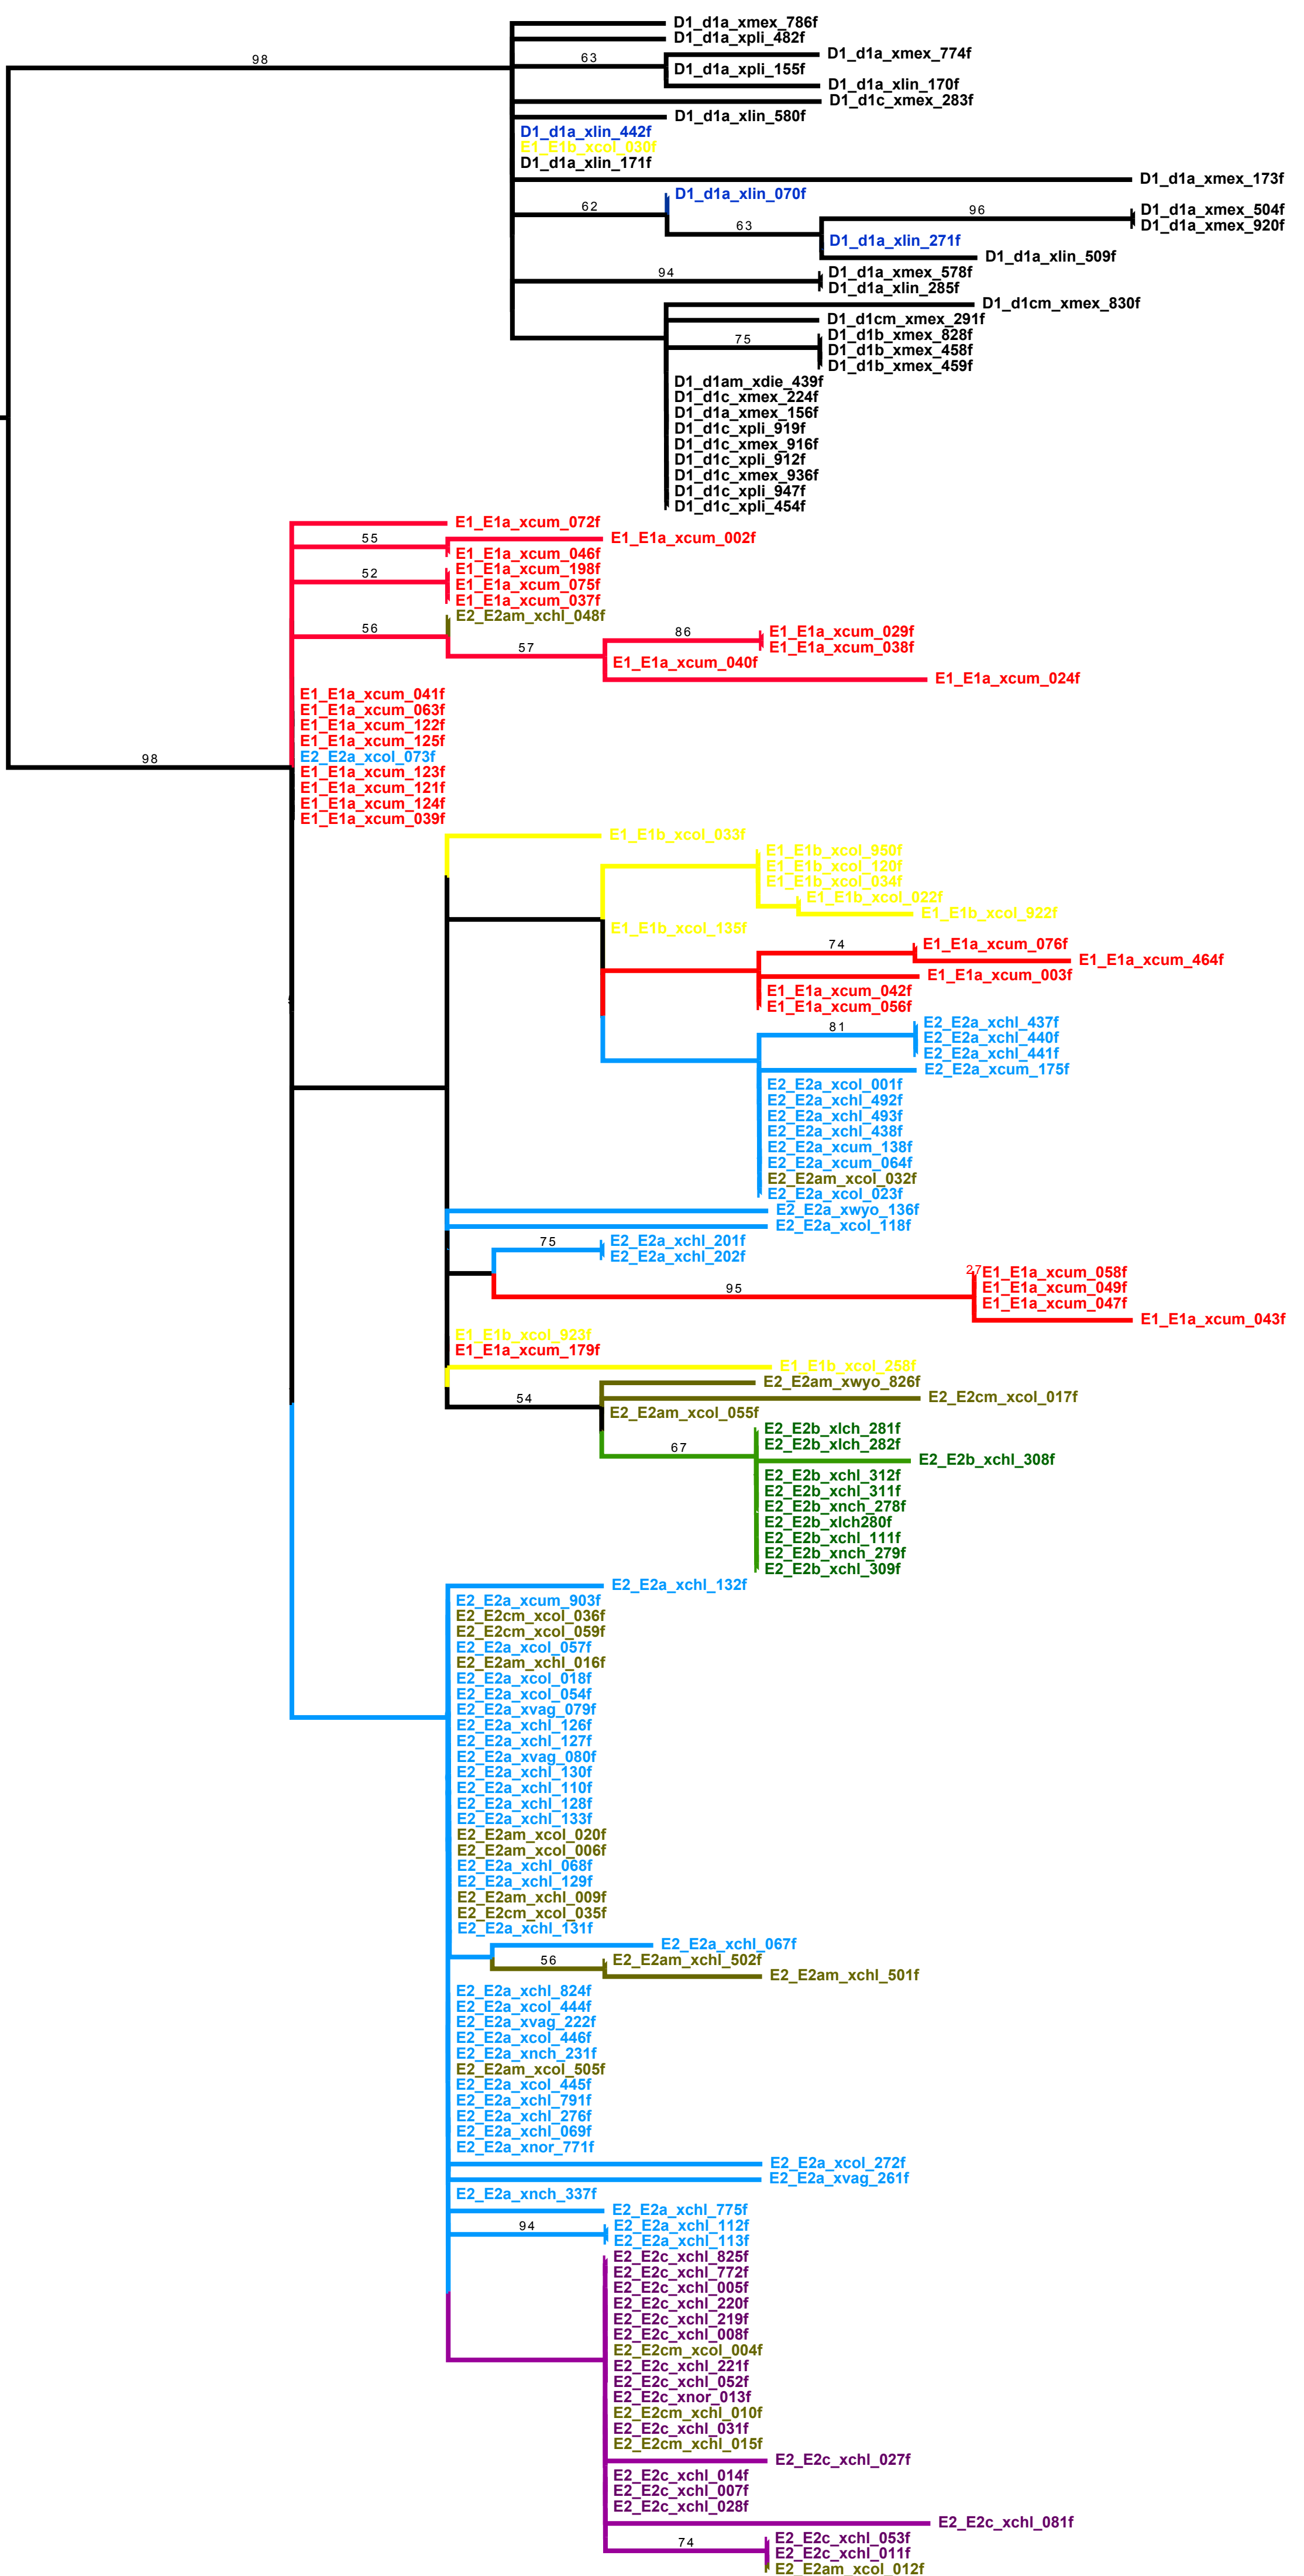

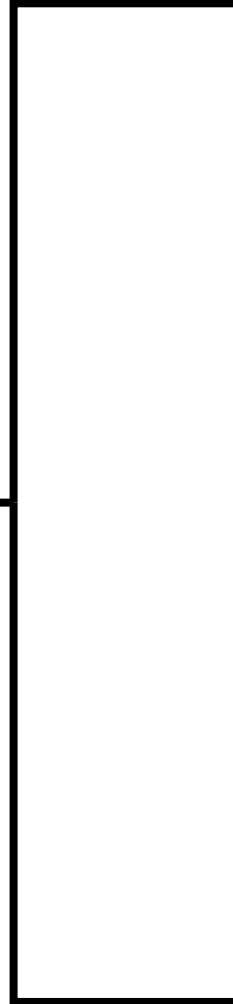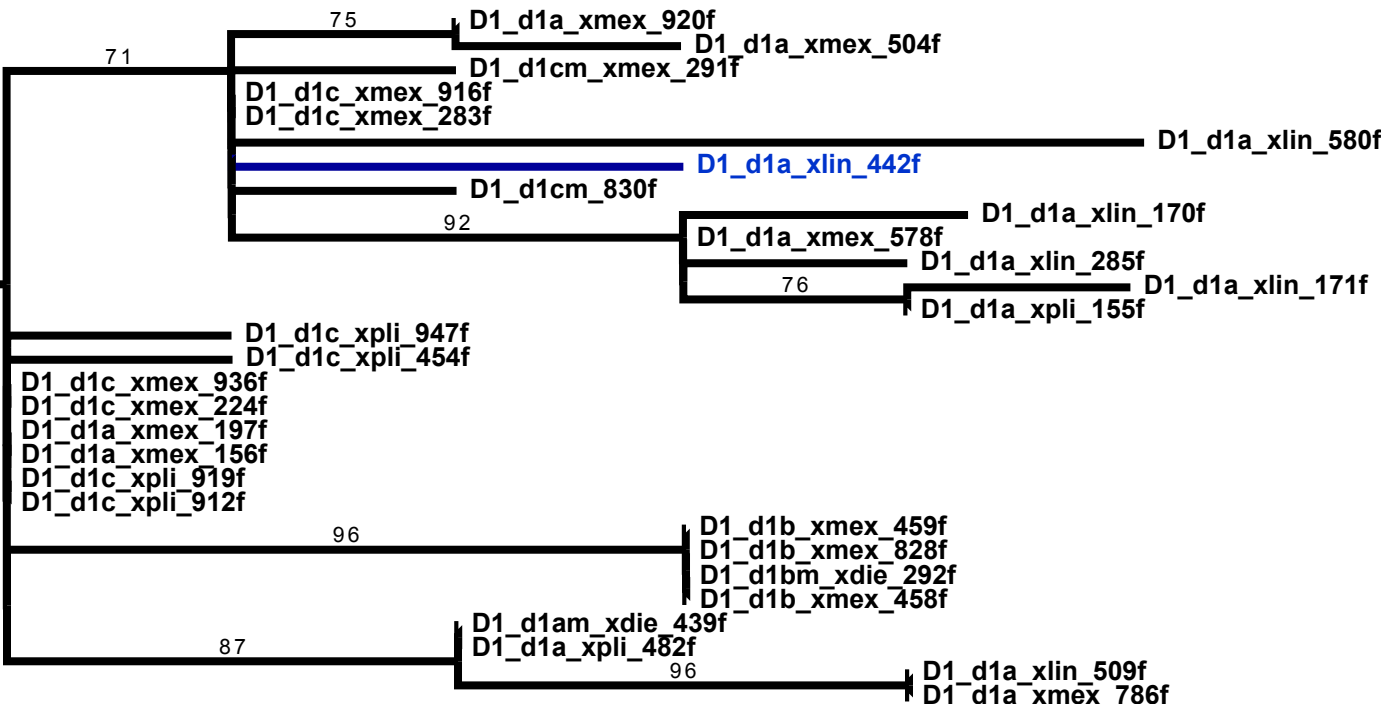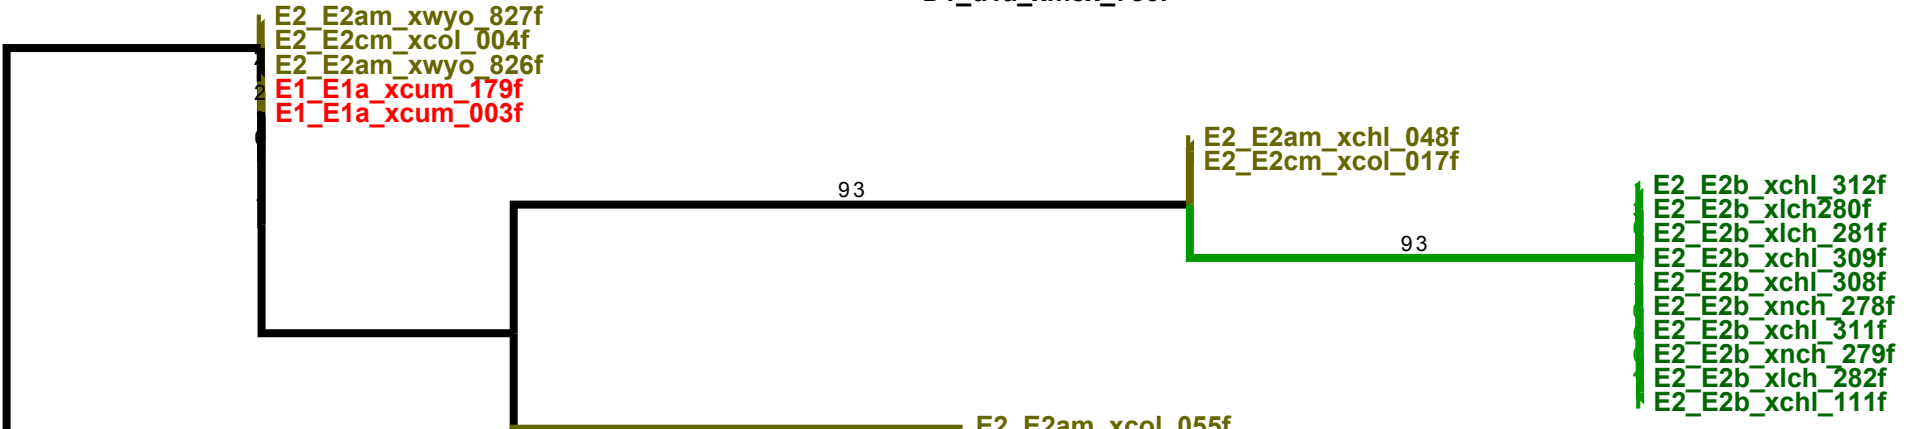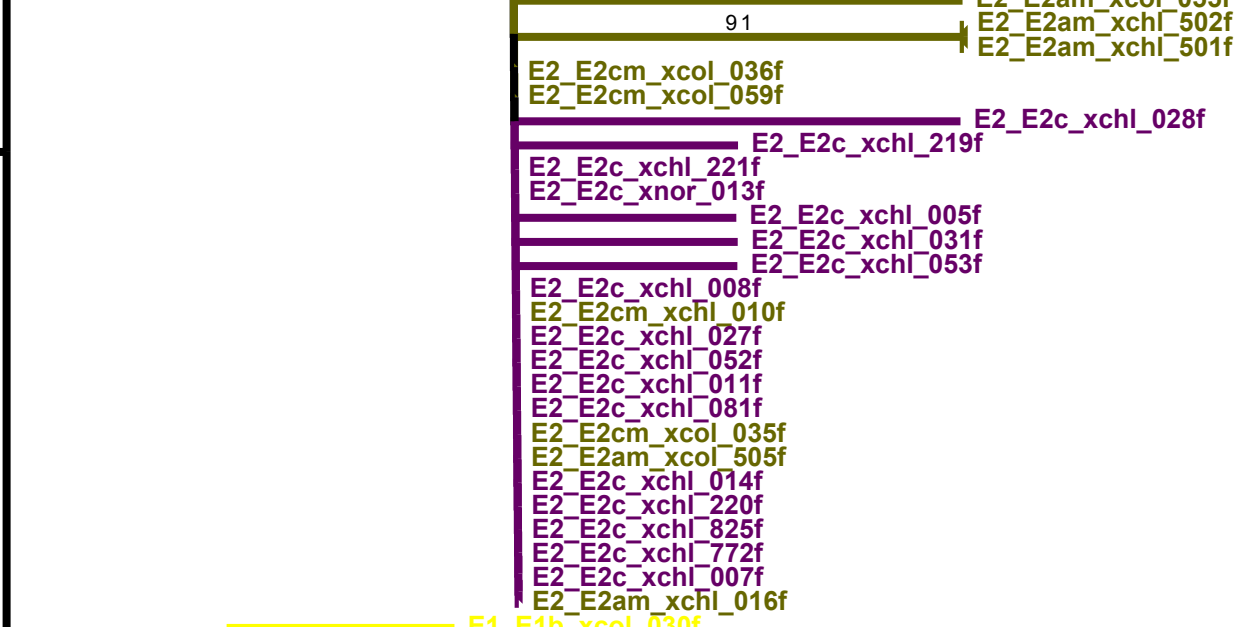

Intron

0.0040 substitutions/site



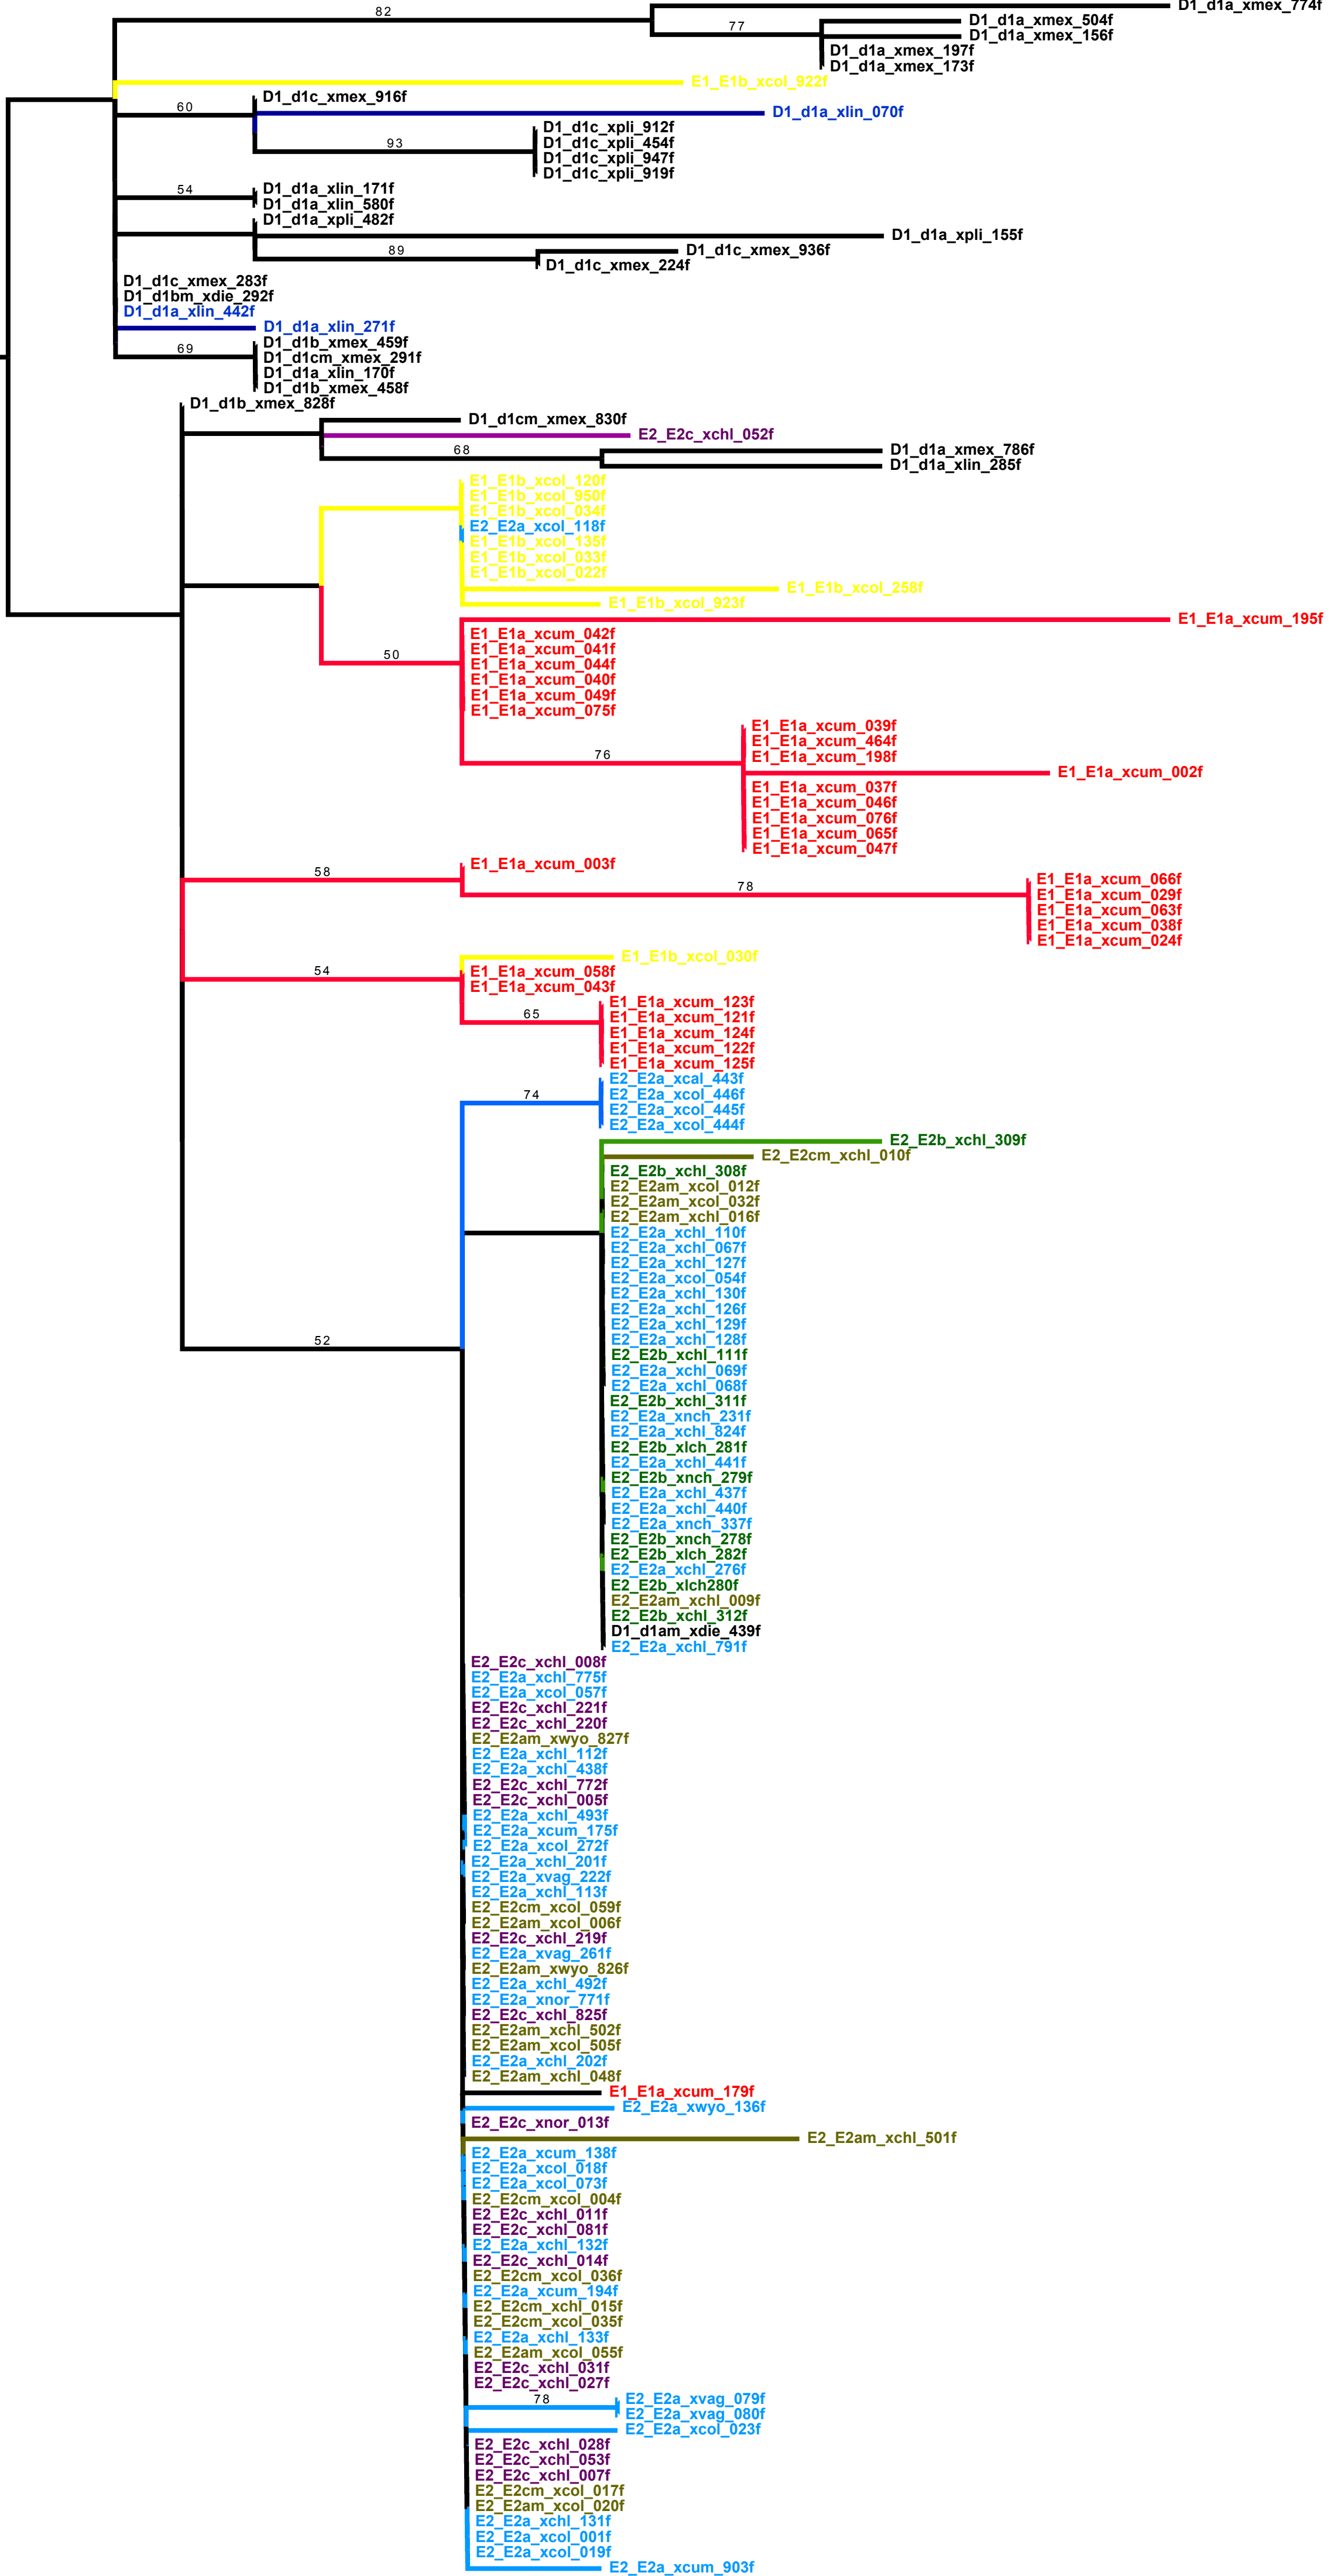

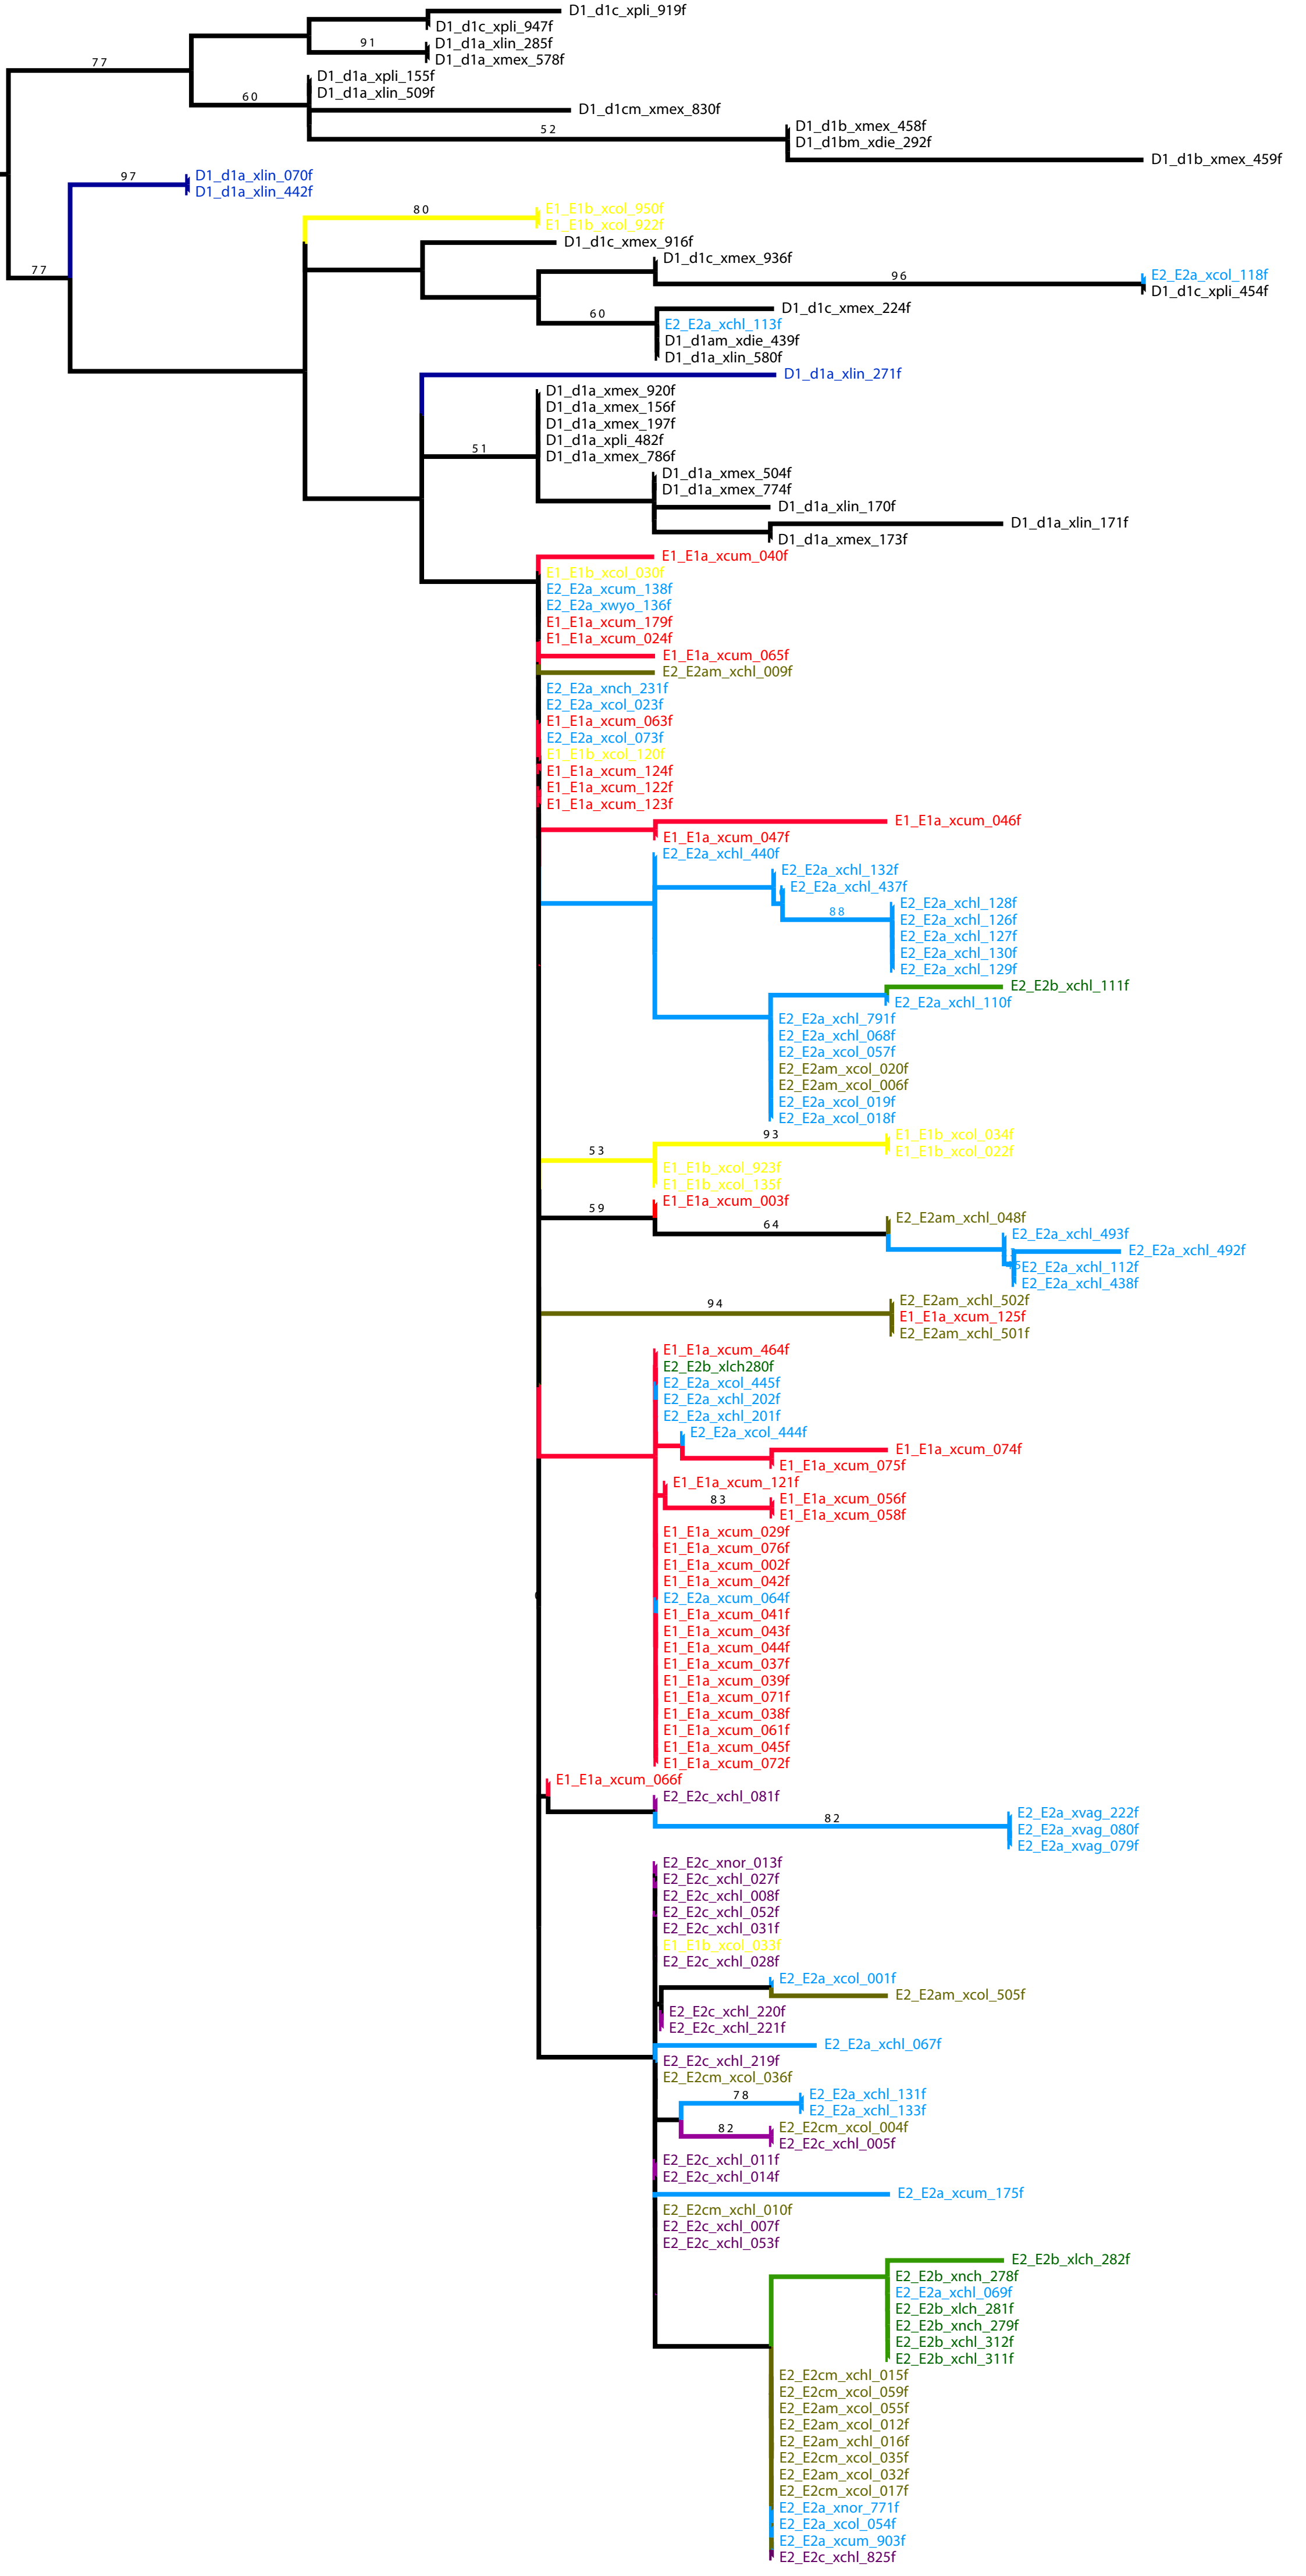

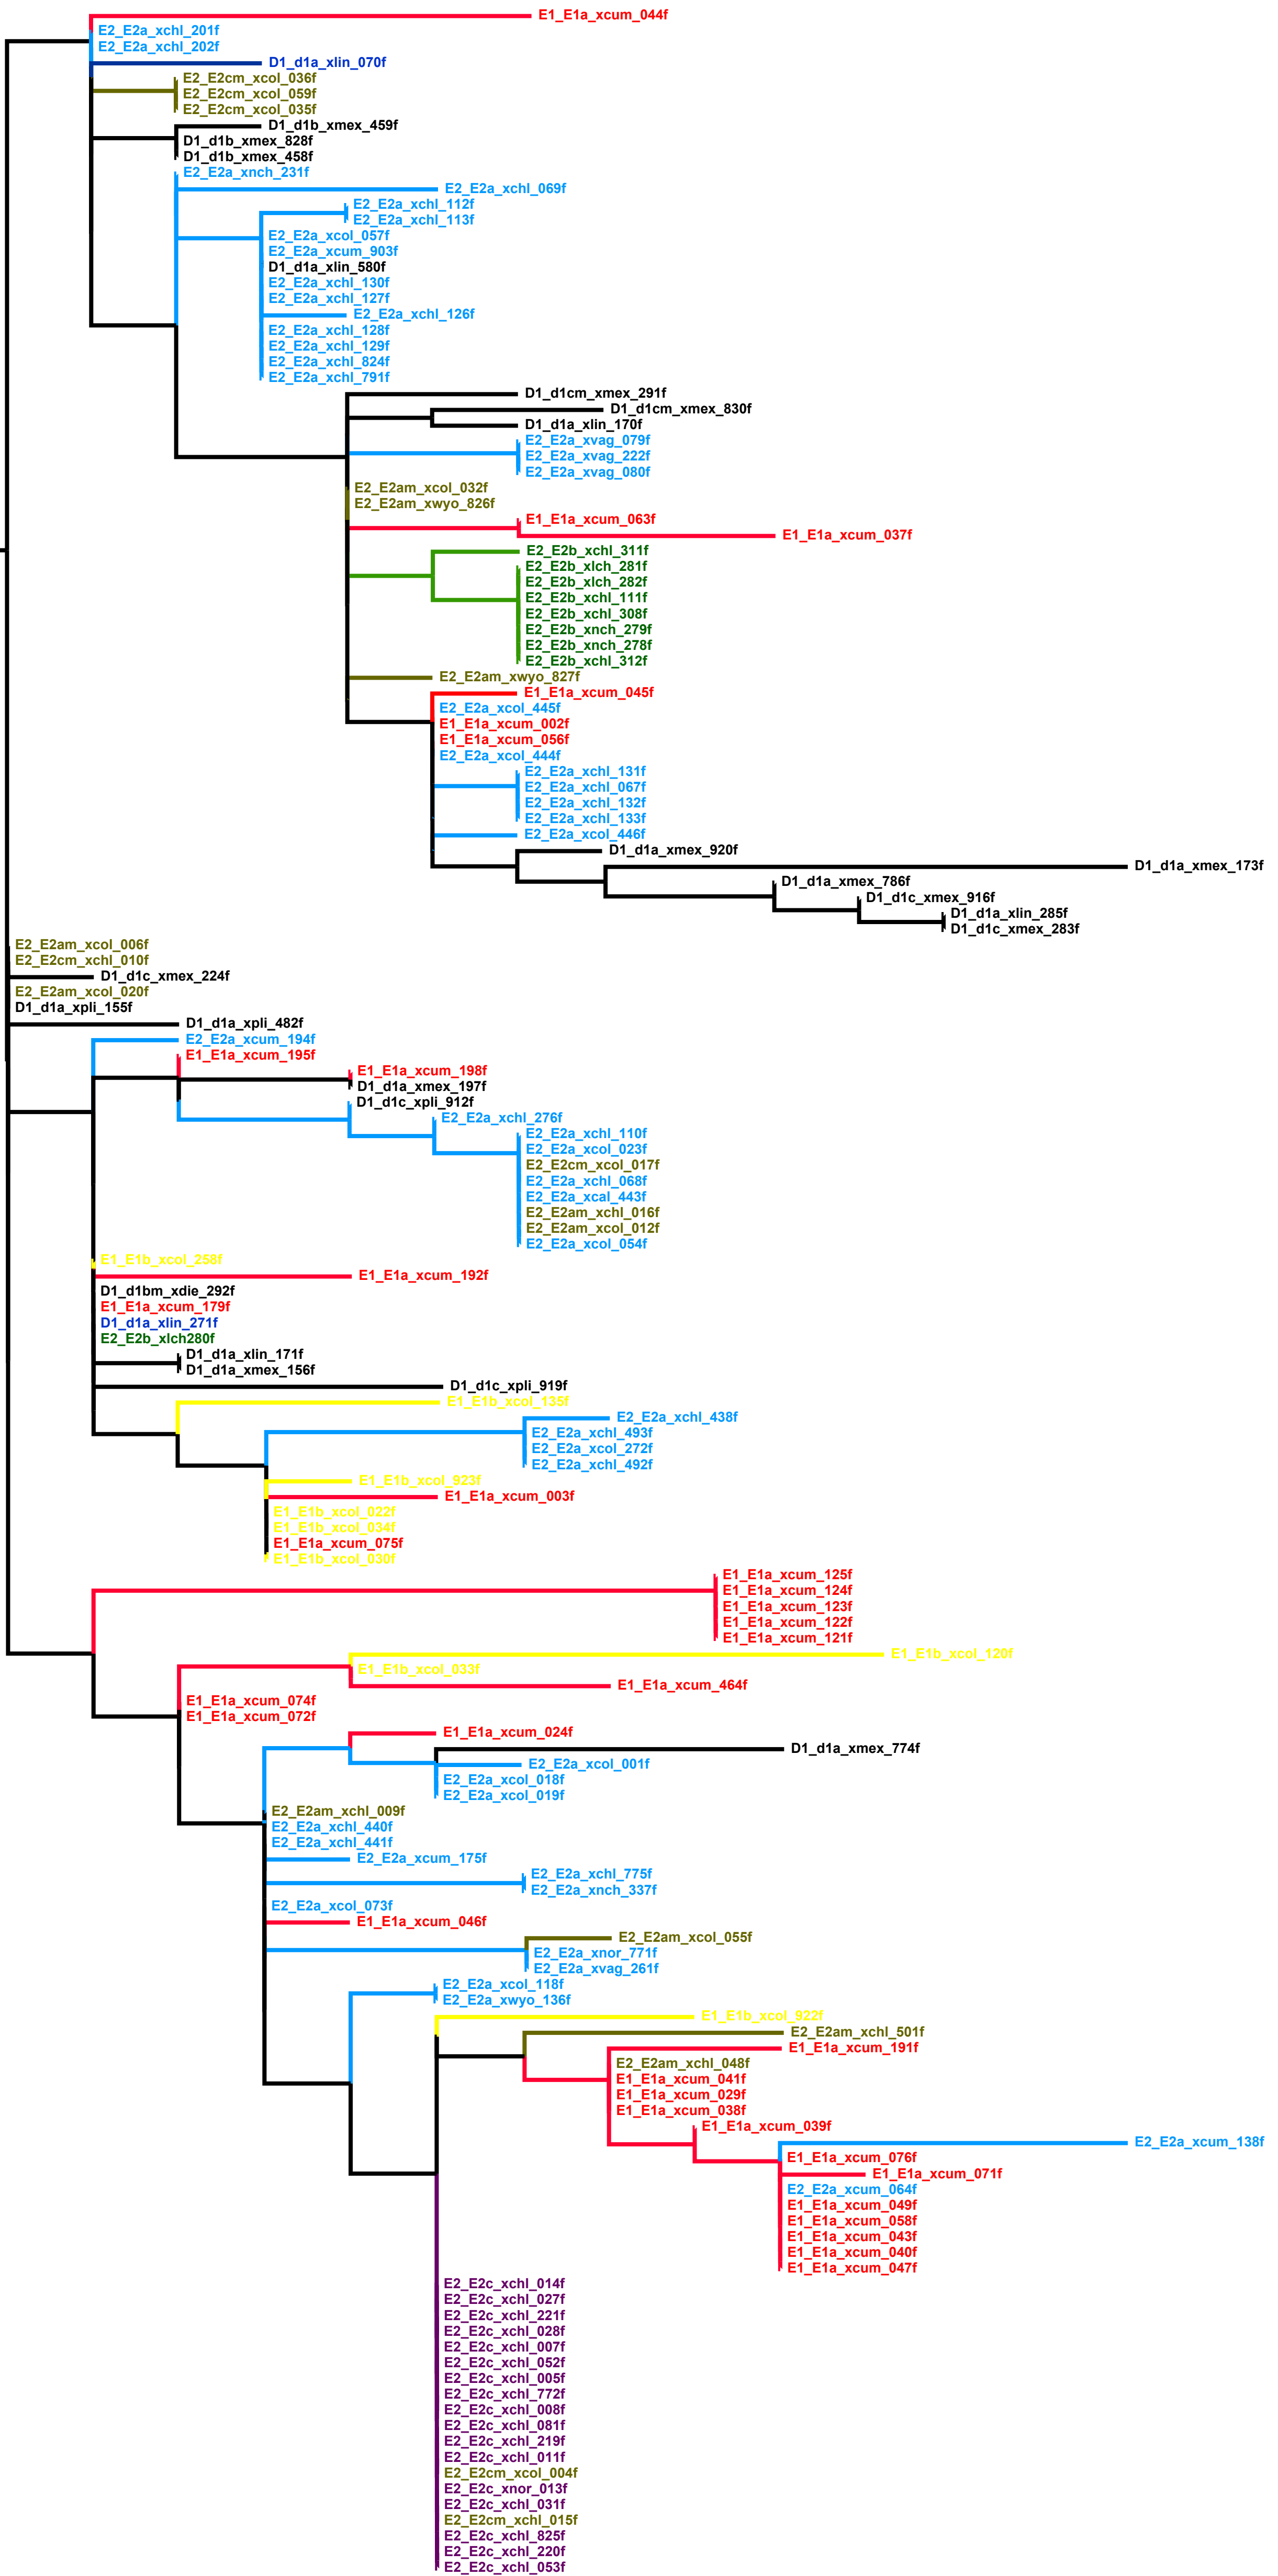

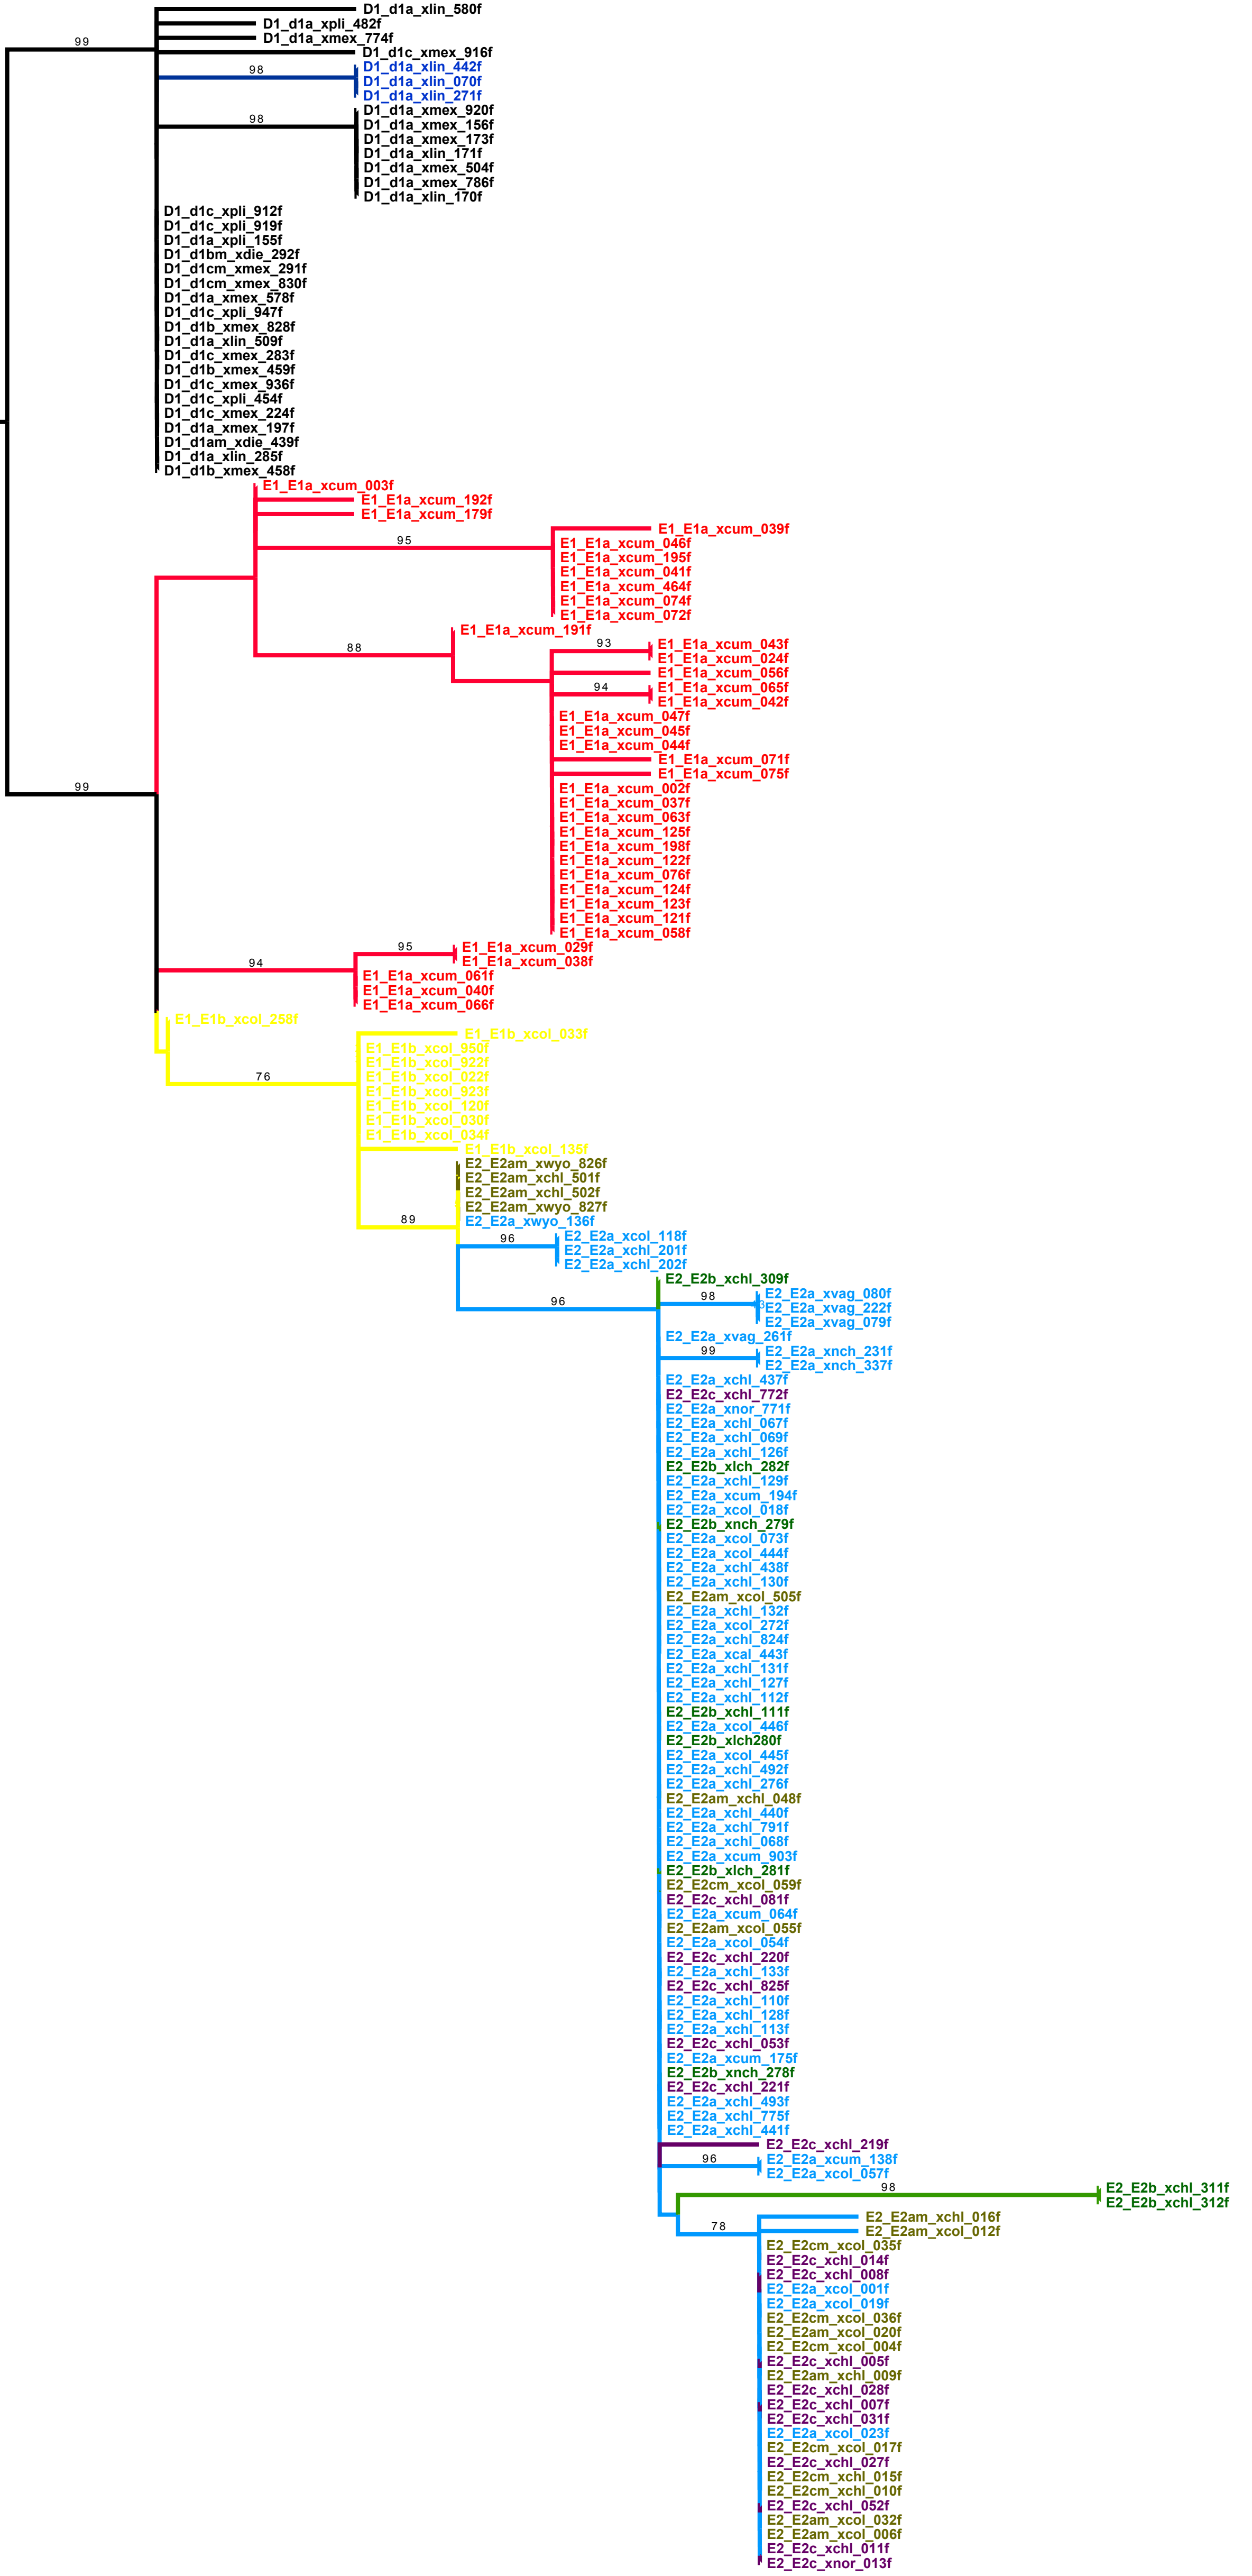



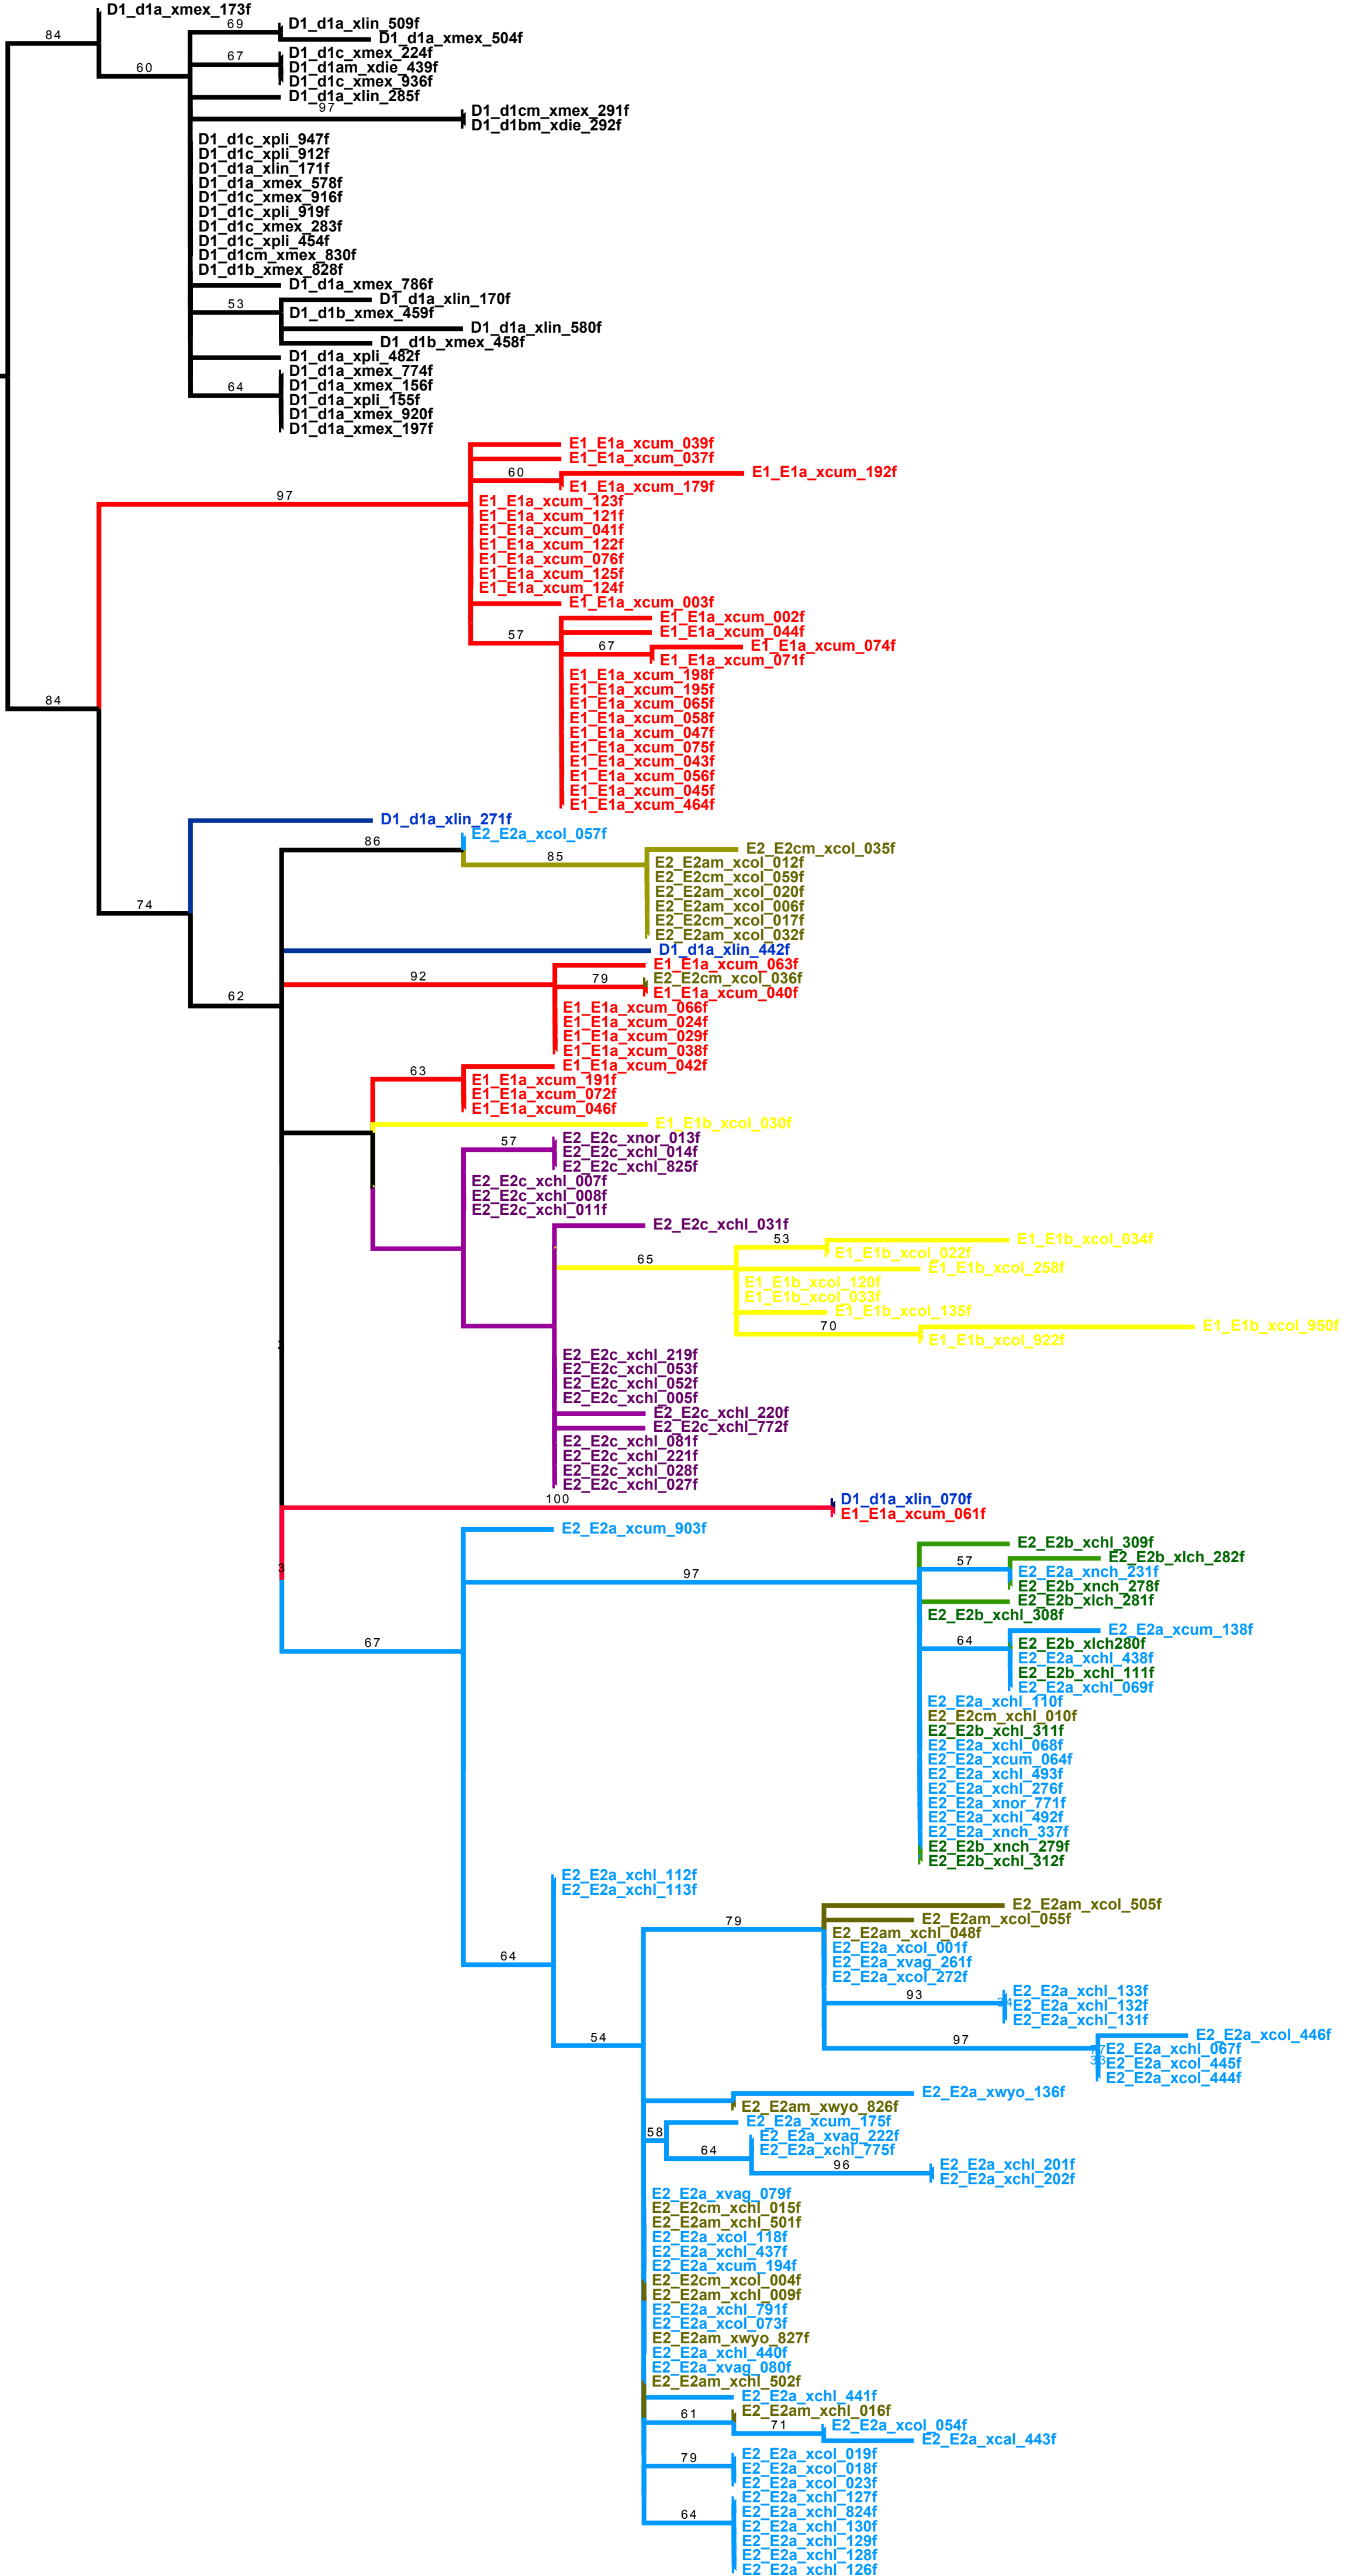

RPB2

0.0030 substitutions/site
