# Supplementary material for: Pleistocene Speciation in North American Lichenized Fungi and the Impact of Alternative Species Circumscriptions and Rates of Molecular Evolution on Divergence Estimates
Source: PLOS journal article supplement (doi:10.1371/journal.pone.0085240), 2013-12-26
Supplement: S4 (10.1371/journal.pone.0085240.s004) [file journal.pone.0085240.s004.pdf › journal.pone.0085240.s004.pdf]

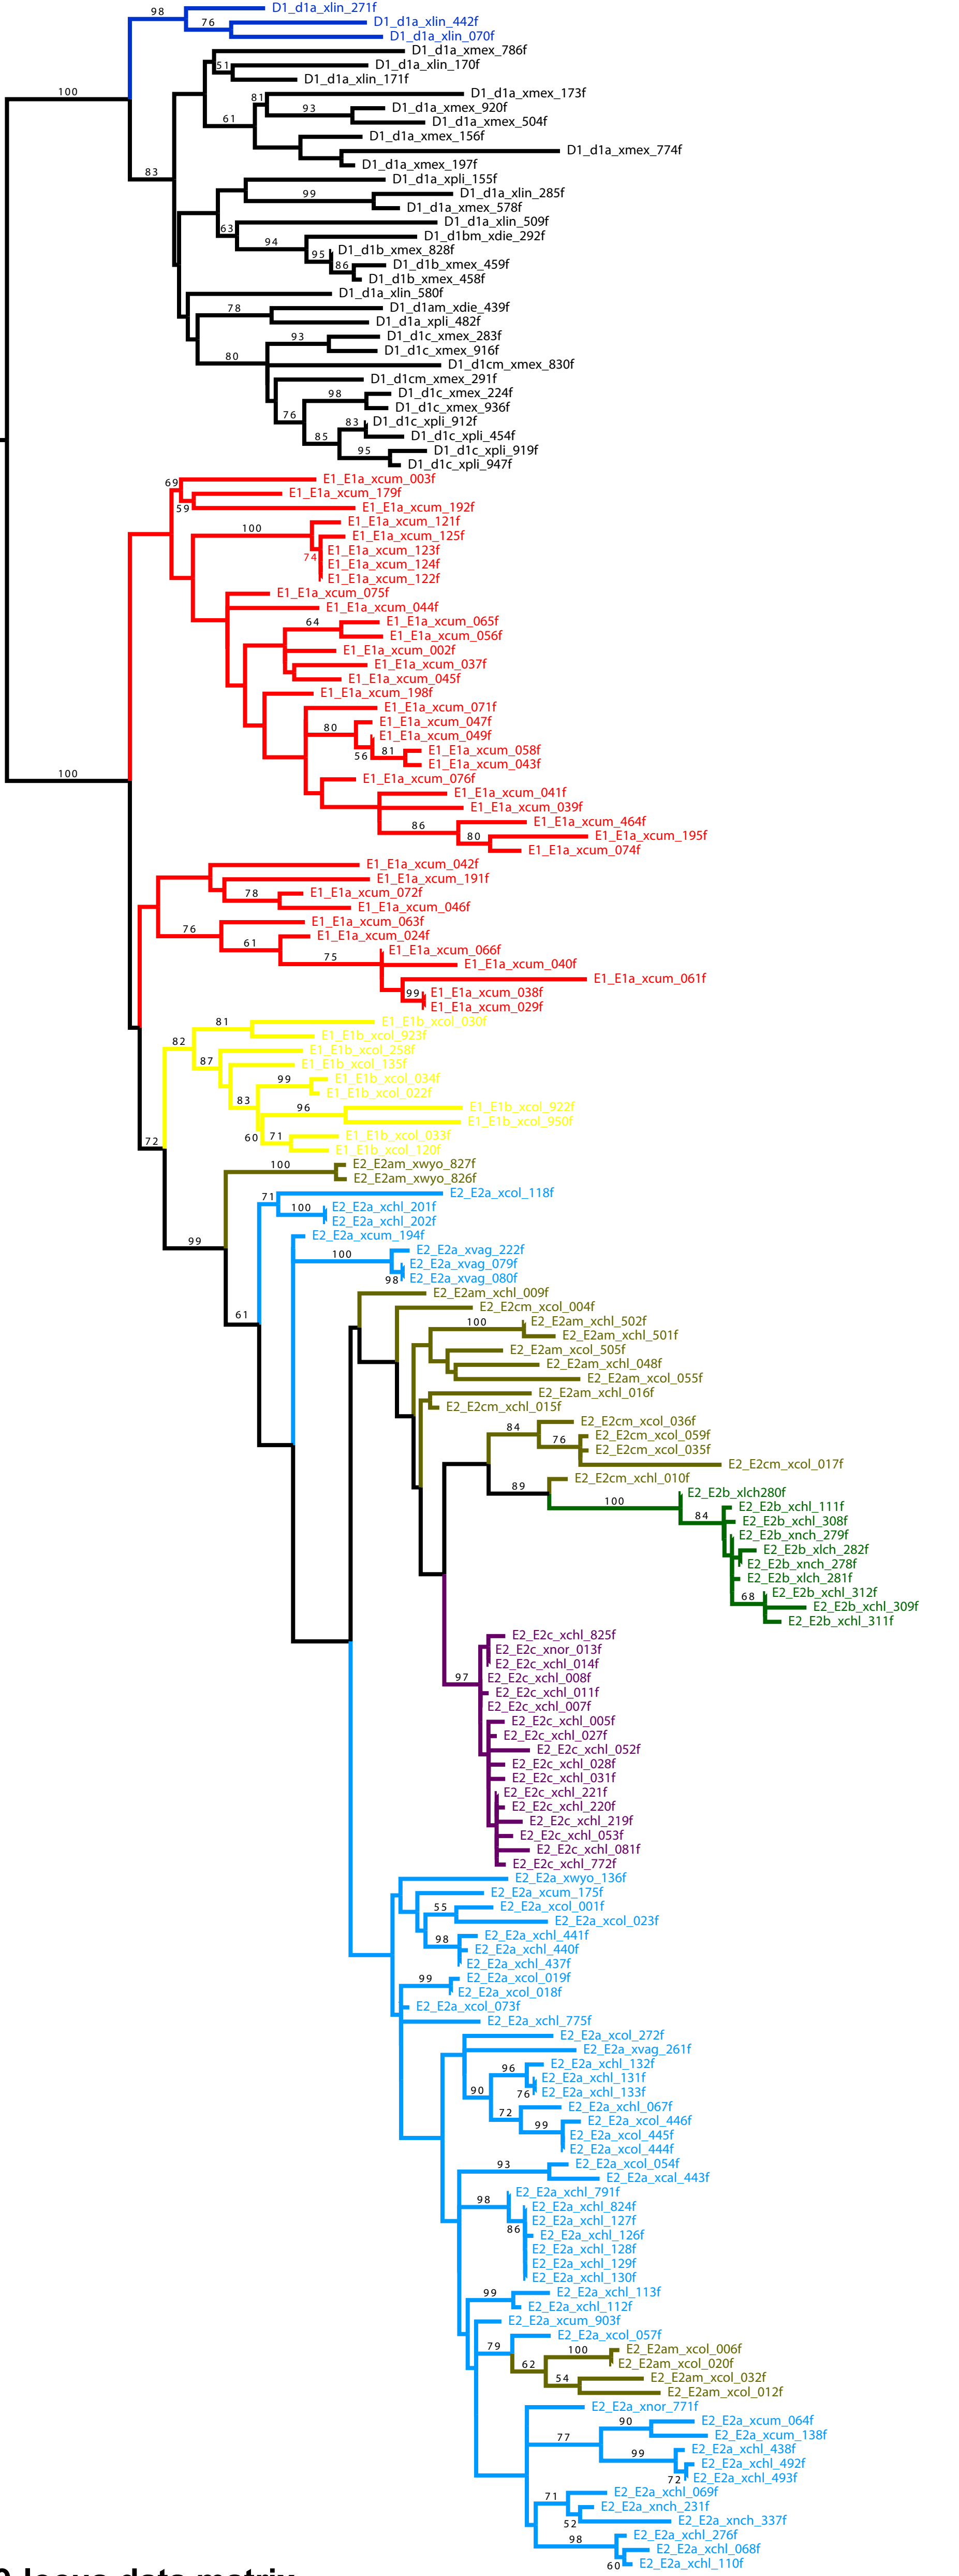

# 9-locus data matrix

ITS, nrLSU, IGS, intron,  $\beta$ -tubulin, GAPDH, MCM7, RPB1, RPB2

0.0070 substitutions/site
