# Supplementary material for: Pleistocene Speciation in North American Lichenized Fungi and the Impact of Alternative Species Circumscriptions and Rates of Molecular Evolution on Divergence Estimates
Source: PLOS journal article supplement (doi:10.1371/journal.pone.0085240), 2013-12-26
Supplement: S5 (10.1371/journal.pone.0085240.s005) [file journal.pone.0085240.s005.pdf › journal.pone.0085240.s005.pdf]

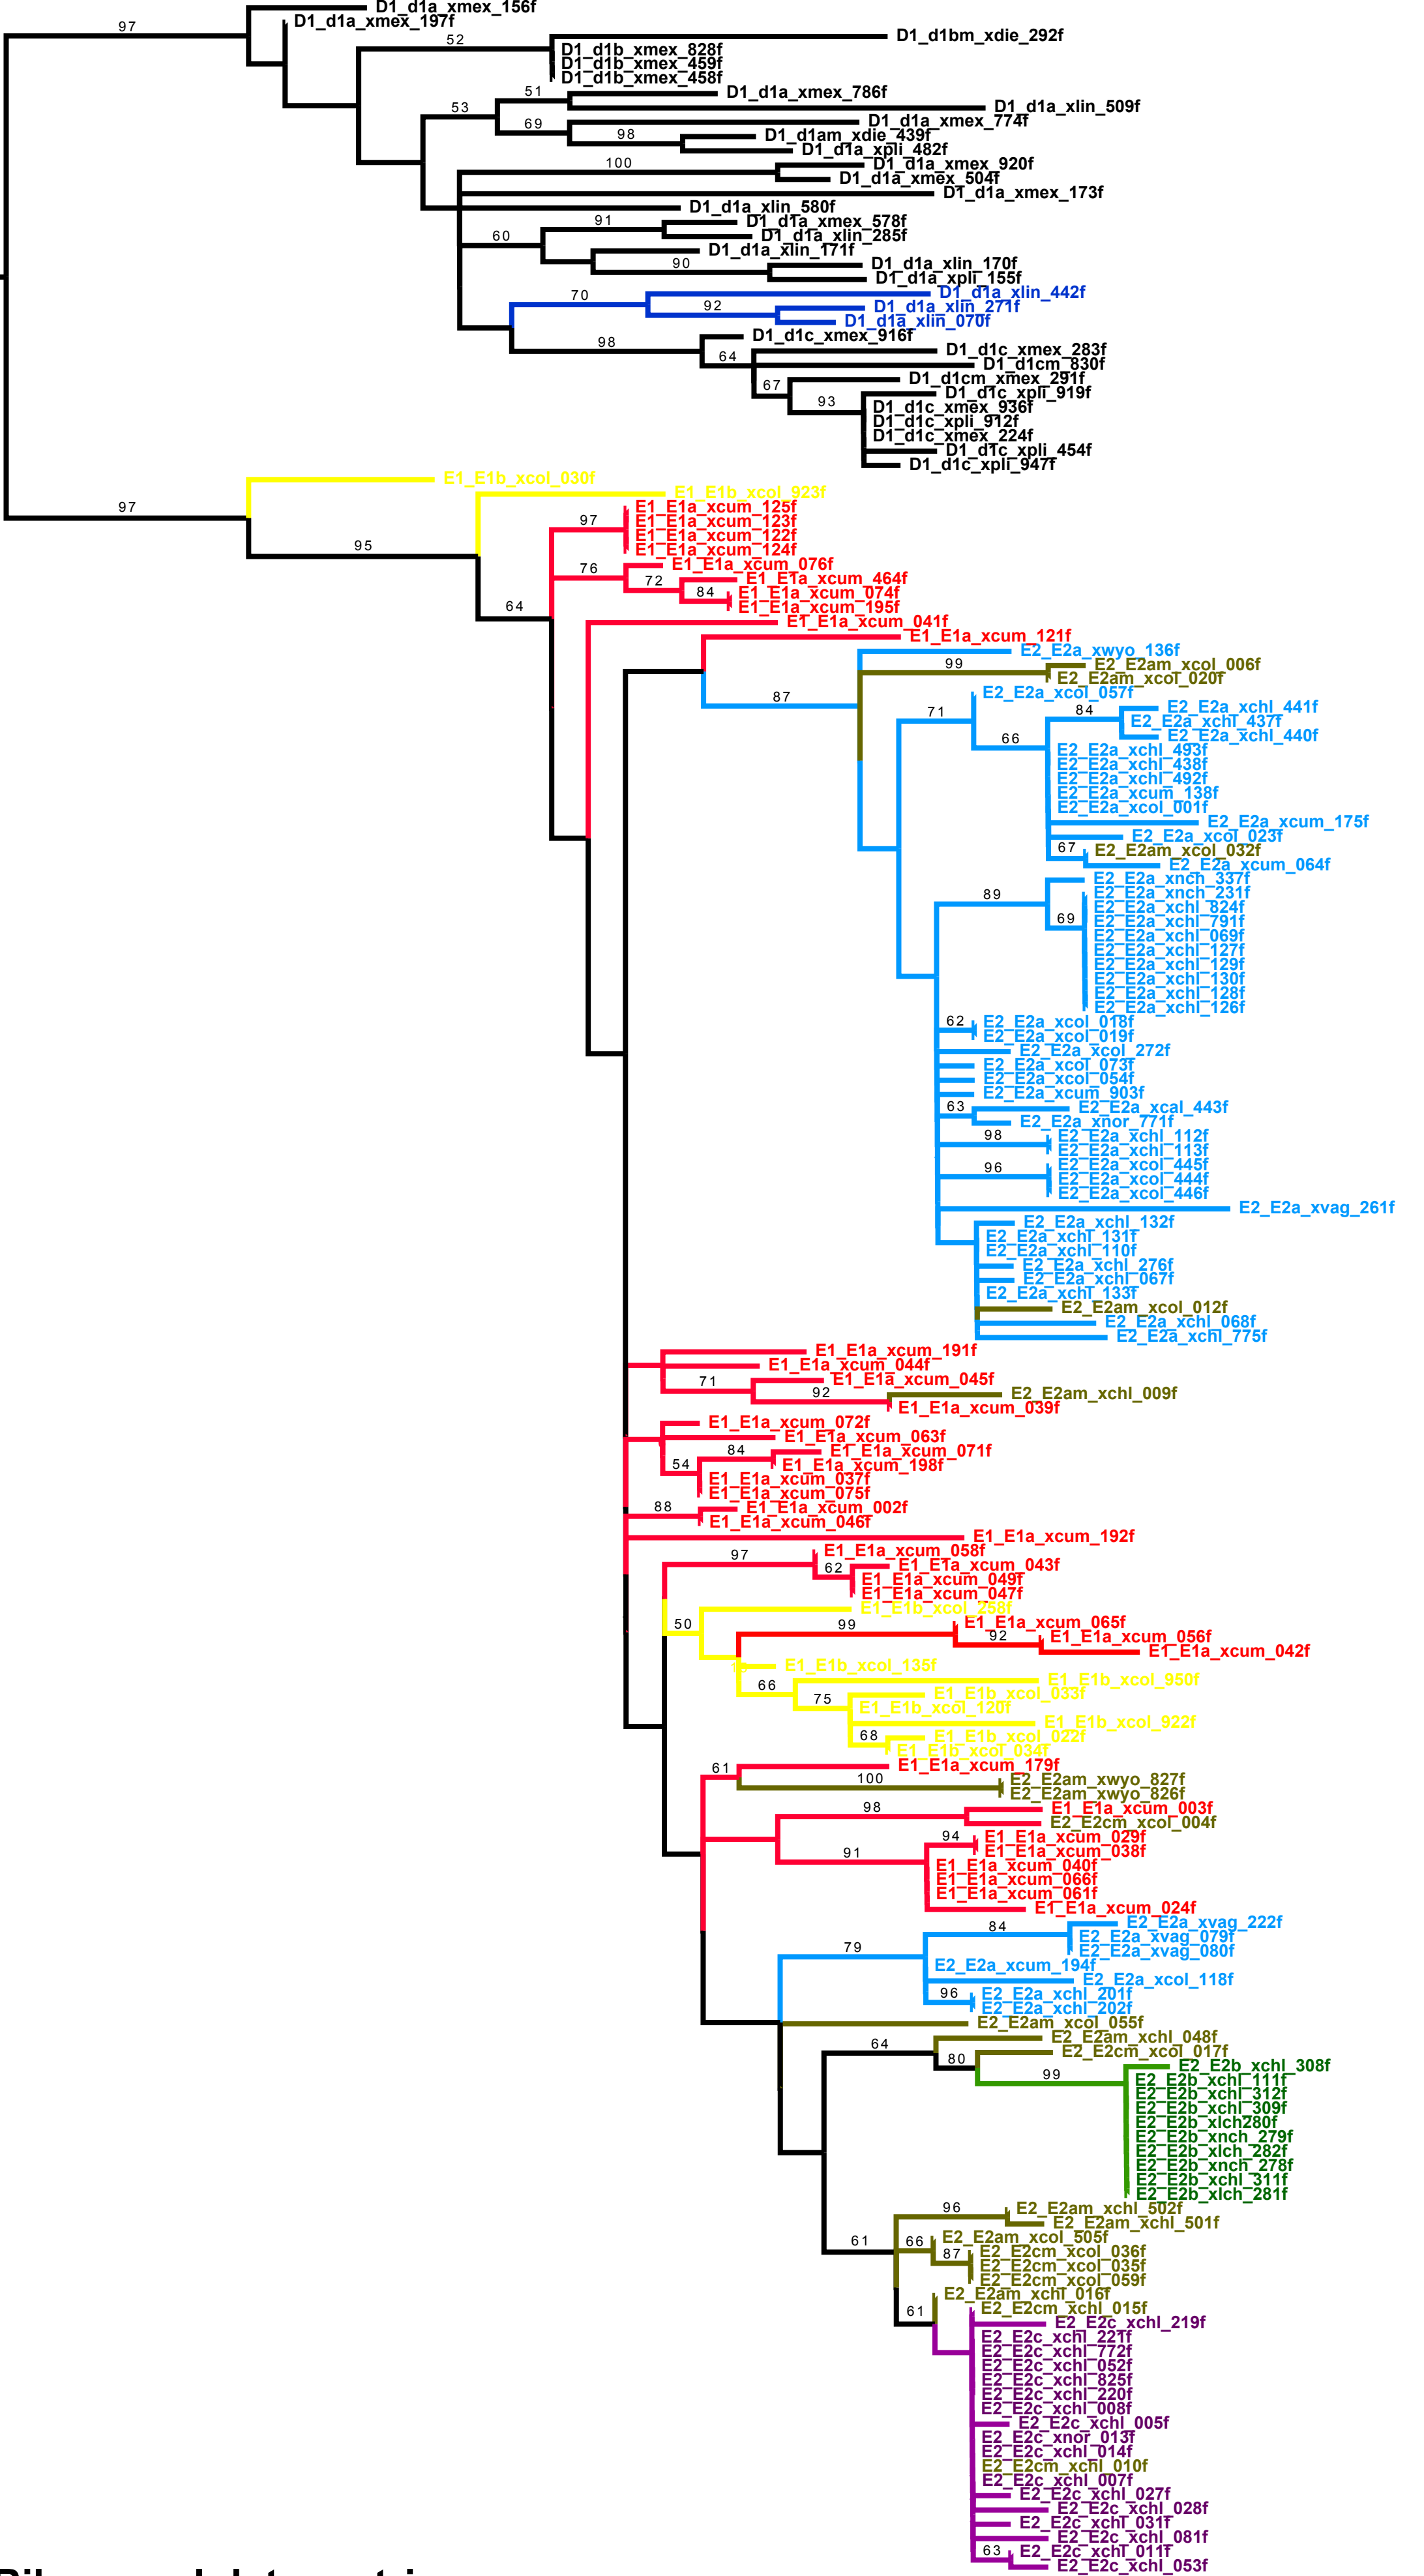

Ribosomal data matrix

ITS, nrLSU, IGS, intron

0.0030 substitutions/site
