# Supplementary material for: Pleistocene Speciation in North American Lichenized Fungi and the Impact of Alternative Species Circumscriptions and Rates of Molecular Evolution on Divergence Estimates
Source: PLOS journal article supplement (doi:10.1371/journal.pone.0085240), 2013-12-26

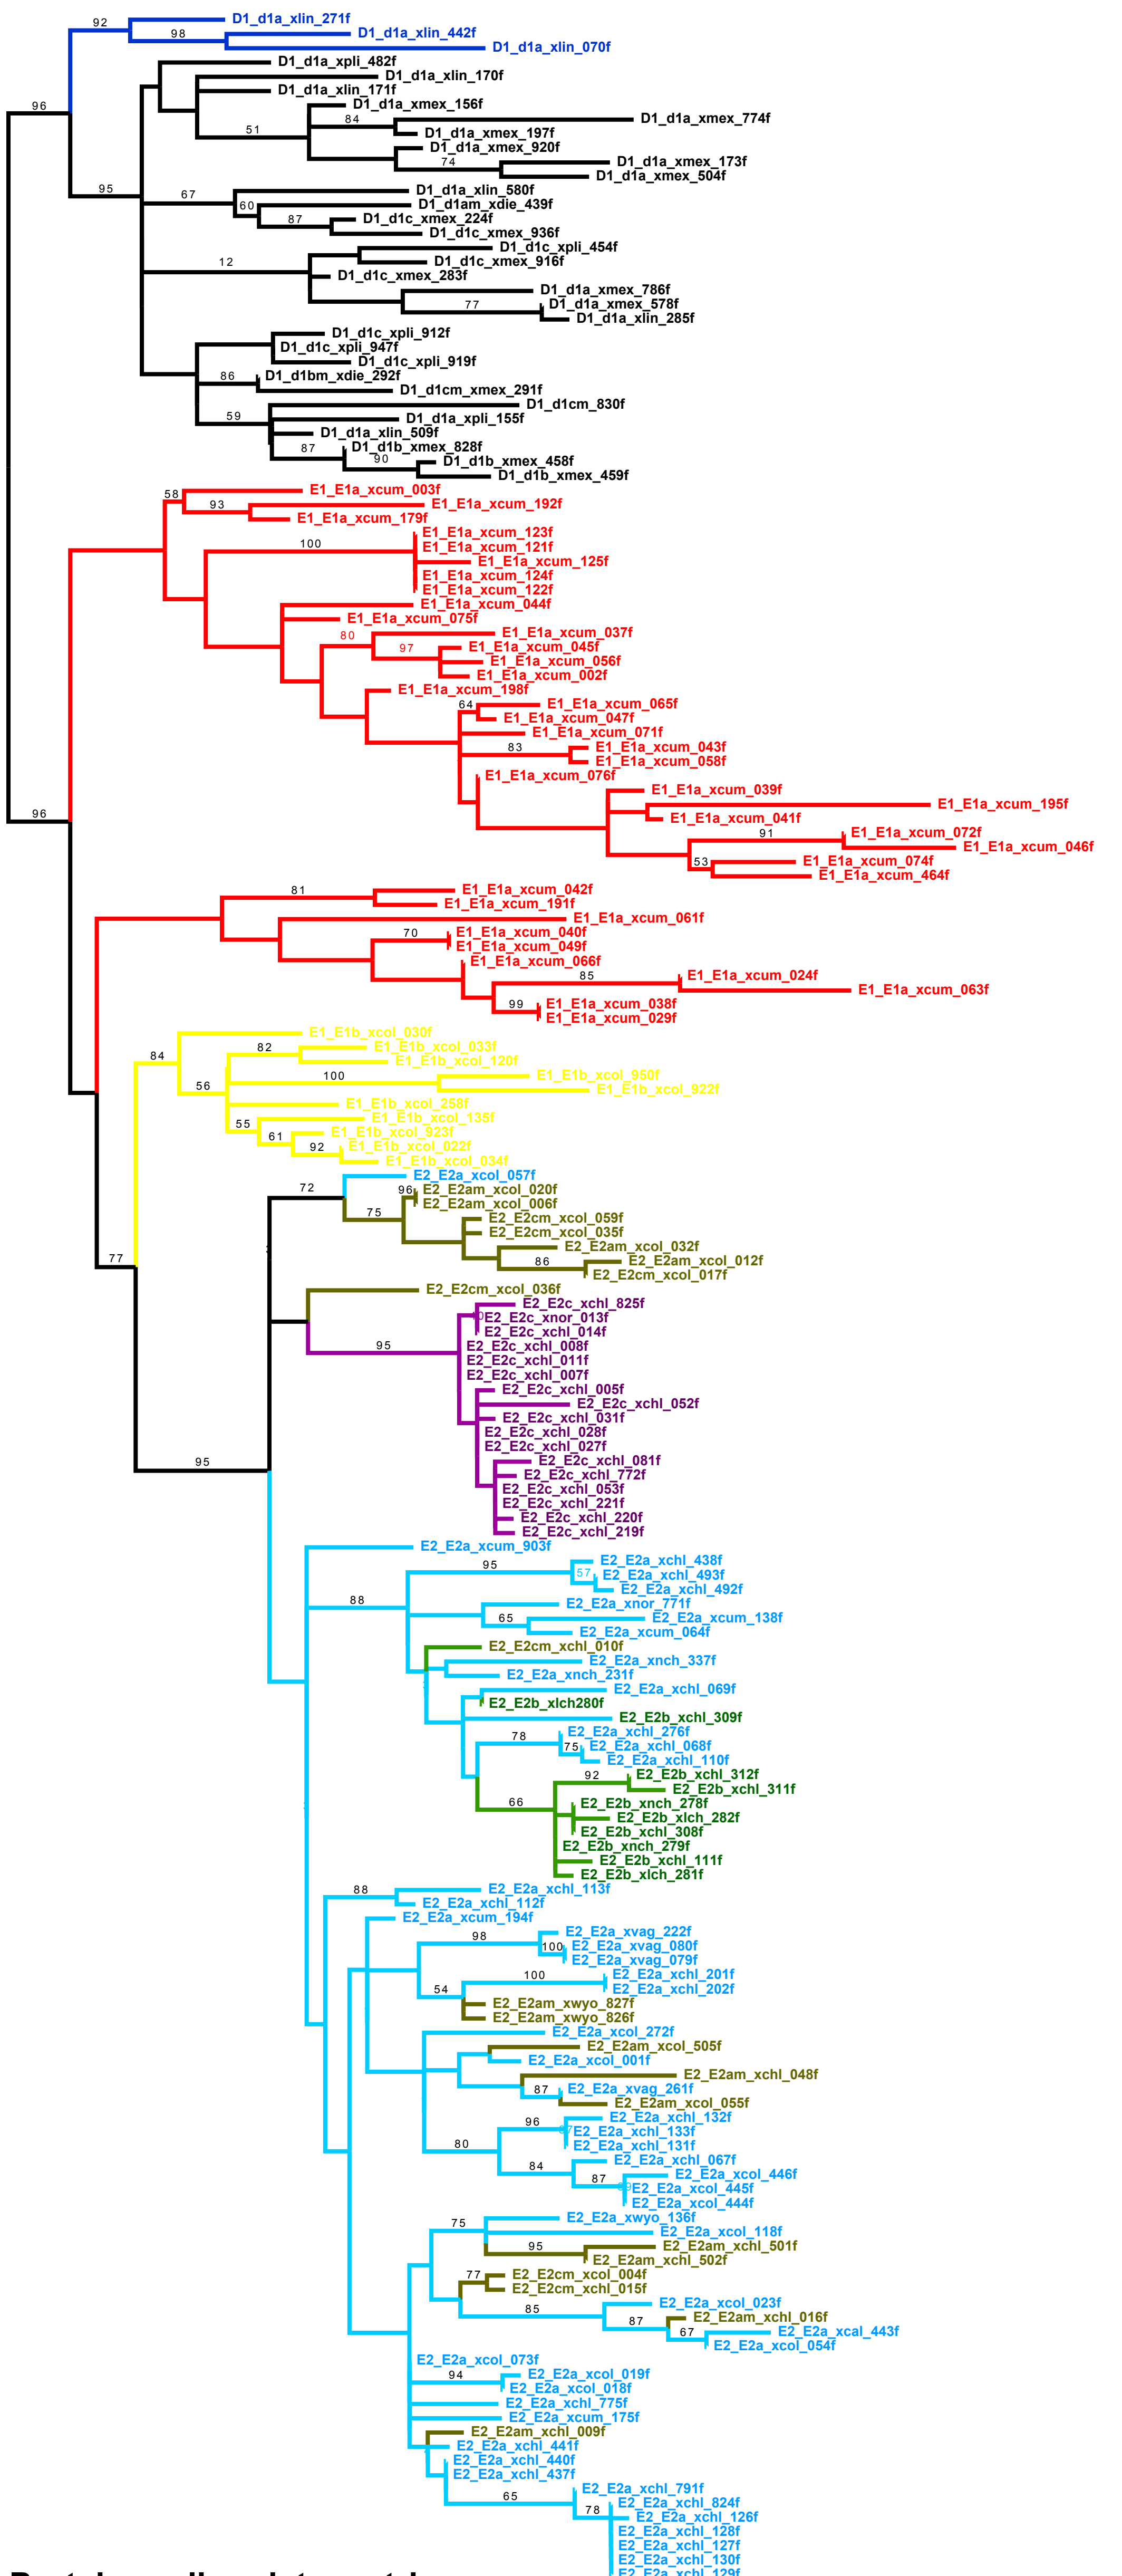

Supplement: S6 (10.1371/journal.pone.0085240.s006) [file journal.pone.0085240.s006.pdf › journal.pone.0085240.s006.pdf]
